# Supplementary material for: Broomeanamides: Cyclic Octapeptides from an Isolate of the Fungicolous Ascomycete Sphaerostilbella broomeana from India
Source: PubMed Central journal article supplement (PMC8314271; doi:10.1021/acs.jnatprod.1c00414), 2021-06-30
Supplement: np1c00414_si_001.pdf [file np1c00414_si_001.pdf]

# Broomeanamides: Cyclic Octapeptides from an Isolate of Fungicolous *Sphaerostilbella broomeana* (Hypocreales, Ascomycota) from India

Dulamini I. Ekanayake,<sup>†</sup> Bruno Perlatti,<sup>‡</sup> Dale C. Swenson,<sup>1</sup> Kadri Põldmaa,<sup>§</sup> Gerald F. Bills<sup>‡</sup> and James B. Gloer<sup>\*,†</sup>

<sup>†</sup>Department of Chemistry, University of Iowa, Iowa City, IA 52242, United States

<sup>‡</sup>Texas Therapeutic Institute, The Brown Foundation Institute of Molecular Medicine, University of Texas Health Science Center, 1881 East Road, Houston, TX 77054, United States

<sup>§</sup>Department of Botany, Institute of Ecology and Earth Sciences, University of Tartu, Lai 40, EE-51005 Tartu, Estonia

## List of Supporting Information

**Figure S1.** Isolate TFC201724 grown for 5d on MEA; a – colony, b–d conidiophores, e – conidia.

**Figure S2.** Maximum likelihood phylogeny of the *Sphaerostilbella broomeana*-group based on translation elongation factor (TEF; 1232 bp) and ITS-LSU (1461 bp) ribosomal DNA sequences<sup>3</sup>. *Sphaerostilbella parabroomeana* was used as an outgroup; bootstrap support values >95% indicated above the branches.

**Figure S3.** <sup>1</sup>H NMR Spectrum of Broomeamide A (**1**; 600 MHz, CDCl<sub>3</sub>)

**Figure S4.** <sup>13</sup>C NMR Spectrum of Broomeamide A (**1**; 400 MHz, CDCl<sub>3</sub>)

**Figure S5.** TOCSY Spectrum of Broomeamide A (**1**; 600 MHz, CDCl<sub>3</sub>)

**Figure S6.** HSQC Spectrum of Broomeamide A (**1**; 600 MHz, CDCl<sub>3</sub>)

**Figure S7.** HMBC Spectrum of Broomeamide A (**1**; 600 MHz, CDCl<sub>3</sub>)

**Figure S8.** Expanded Carbonyl Region of the HMBC Spectrum of Broomeamide A (**1**; 600 MHz, CDCl<sub>3</sub>)

**Figure S9.** ROESY Spectrum of Broomeamide A (**1**; 600 MHz, CDCl<sub>3</sub>)

**Figure S10.** HRESIMS data for Broomeamide A (**1**)

**Figure S11.** HPLC-MS data from Marfey's analysis of **1**.

**Figure S12.** <sup>1</sup>H NMR Spectrum of Broomeamide B (**2**; 500 MHz, CDCl<sub>3</sub>)

**Figure S13.** TOCSY Spectrum of Broomeanamide B (**2**; 500 MHz, CDCl<sub>3</sub>)

**Figure S14.** HSQC Spectrum of Broomeanamide B (**2**; 500 MHz, CDCl<sub>3</sub>)

**Figure S15.** HMBC Spectrum of Broomeanamide B (**2**; 500 MHz, CDCl<sub>3</sub>)

**Figure S16.** <sup>1</sup>H NMR Spectrum of Broomeanamide C (**3**; 500 MHz, CDCl<sub>3</sub>)

**Figure S17.** TOCSY Spectrum of Broomeanamide C (**3**; 500 MHz, CDCl<sub>3</sub>)

**Figure S18.** HSQC Spectrum of Broomeanamide C (**3**; 500 MHz, CDCl<sub>3</sub>)

**Figure S19.** HMBC Spectrum of Broomeanamide C (**3**; 500 MHz, CDCl<sub>3</sub>)

**Figure S20.** MIC data

**Figure S21.** <sup>1</sup>H NMR Spectrum of **4** (500 MHz, CDCl<sub>3</sub>)

**Figure S22.** NOESY Spectrum of **4** (600 MHz, CDCl<sub>3</sub>)

**Figure S23.** Expanded Aromatic Region of the NOESY Spectrum of **4** (**4**; 600 MHz, CDCl<sub>3</sub>)

**Figure S24.** <sup>1</sup>H NMR Spectrum of **5** (600 MHz, CDCl<sub>3</sub>)

**Figure S25.** <sup>13</sup>C NMR Spectrum of **5** (100 MHz, CDCl<sub>3</sub>)

**Figure S26.** <sup>1</sup>H NMR Spectrum of **6** (600 MHz, CDCl<sub>3</sub>)

**Figure S27.** <sup>13</sup>C NMR Spectrum of **6** (100 MHz, CDCl<sub>3</sub>)

**Figure S28.** <sup>1</sup>H NMR Spectrum of **7** (600 MHz, CDCl<sub>3</sub>)

**Table S1.** NMR spectroscopic data of broomeanamide B (**2**) in CDCl<sub>3</sub>

**Table S2.** NMR spectroscopic data of broomeanamide C (**3**) in CDCl<sub>3</sub>

\*To whom correspondence should be addressed. Tel: 319-335-1361. E-mail: james-gloer@uiowa.edu.

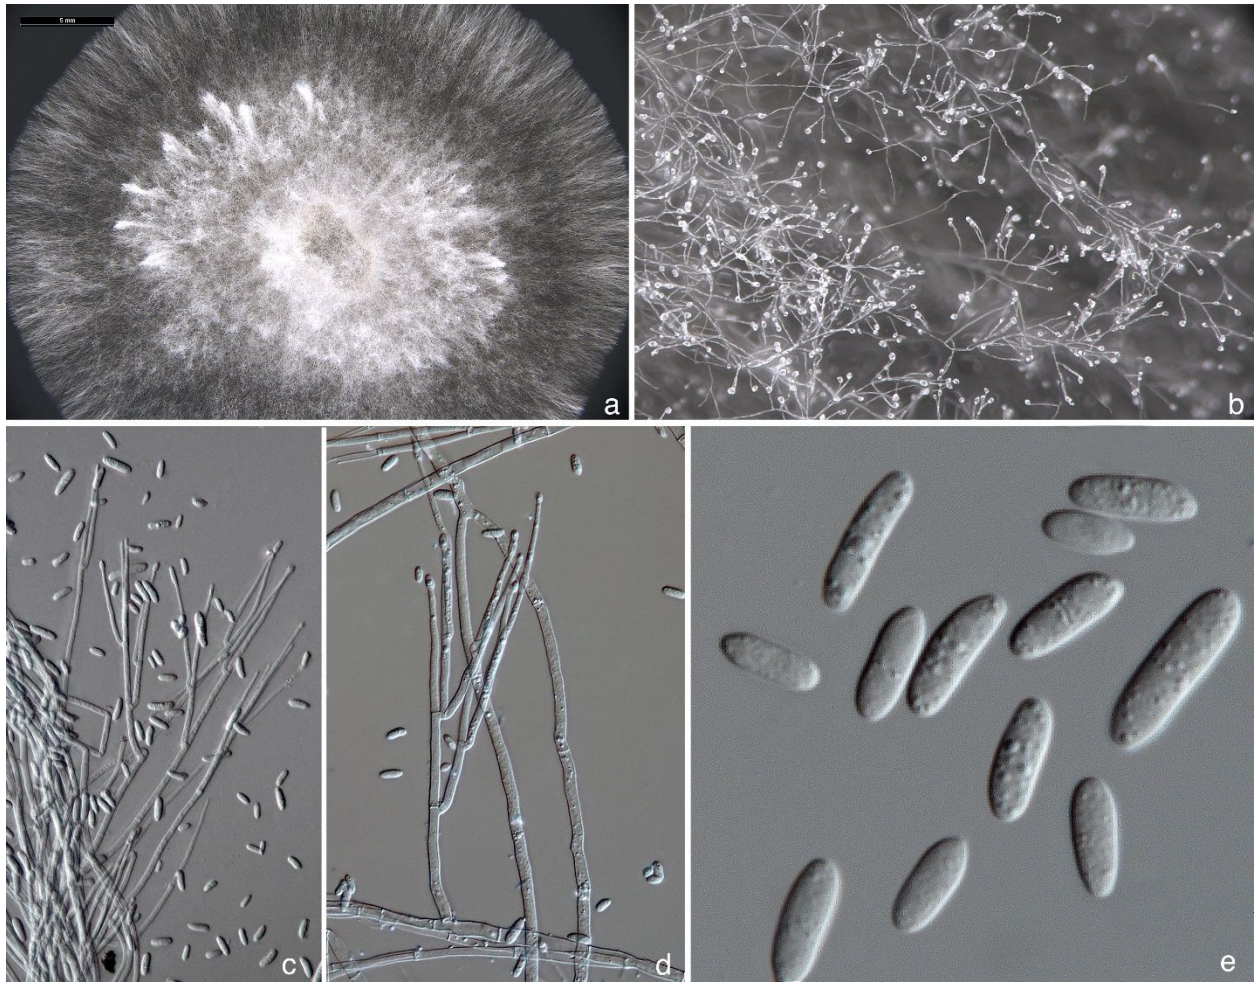

**Figure S1.** Isolate TFC201724 grown for 5d on MEA; a – colony, b–d conidiophores, e – conidia.

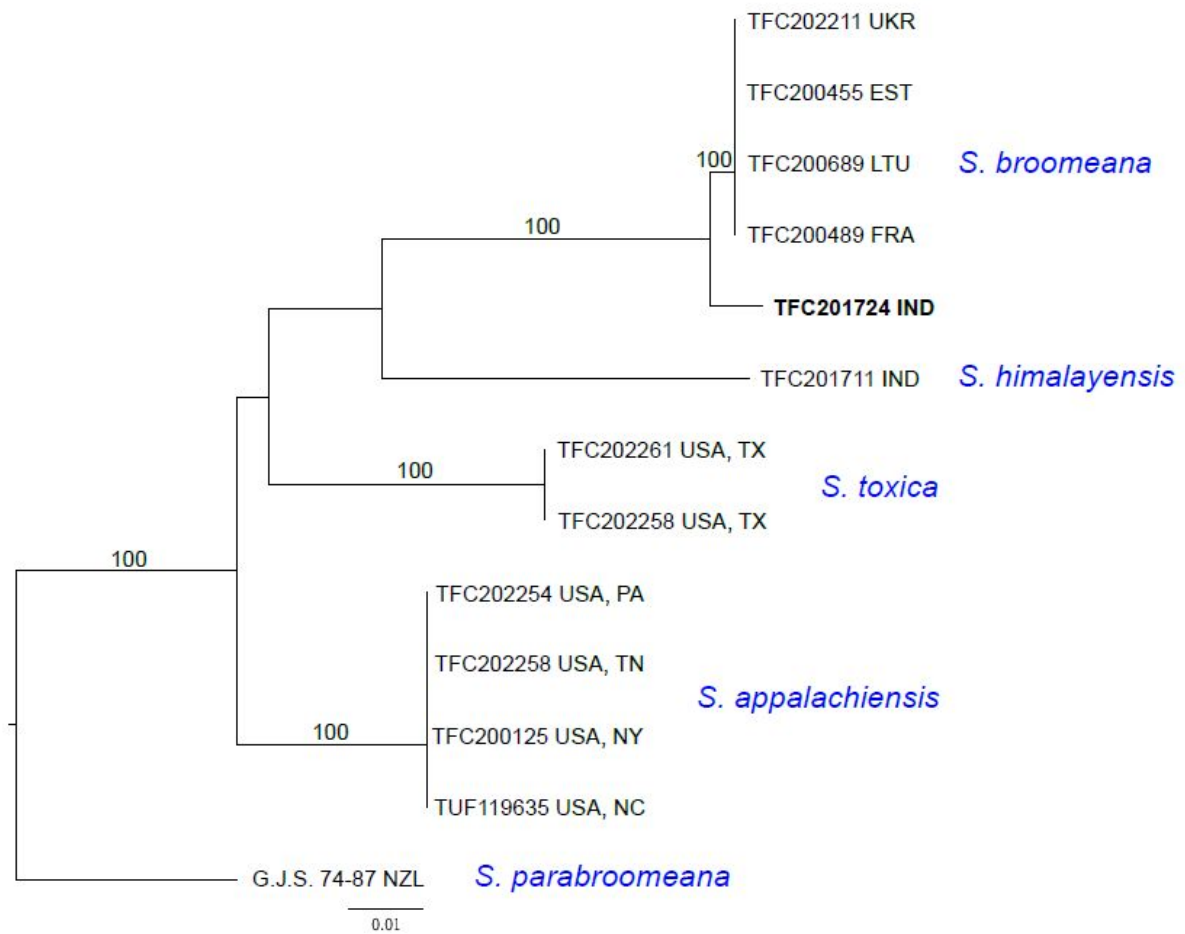

**Figure S2.** Maximum likelihood phylogeny of the *Sphaerostilbella broomeana*-group based on translation elongation factor (TEF; 1232 bp) and ITS-LSU (1461 bp) ribosomal DNA sequences<sup>3</sup>. *Sphaerostilbella parabroomeana* was used as an outgroup; bootstrap support values >95%

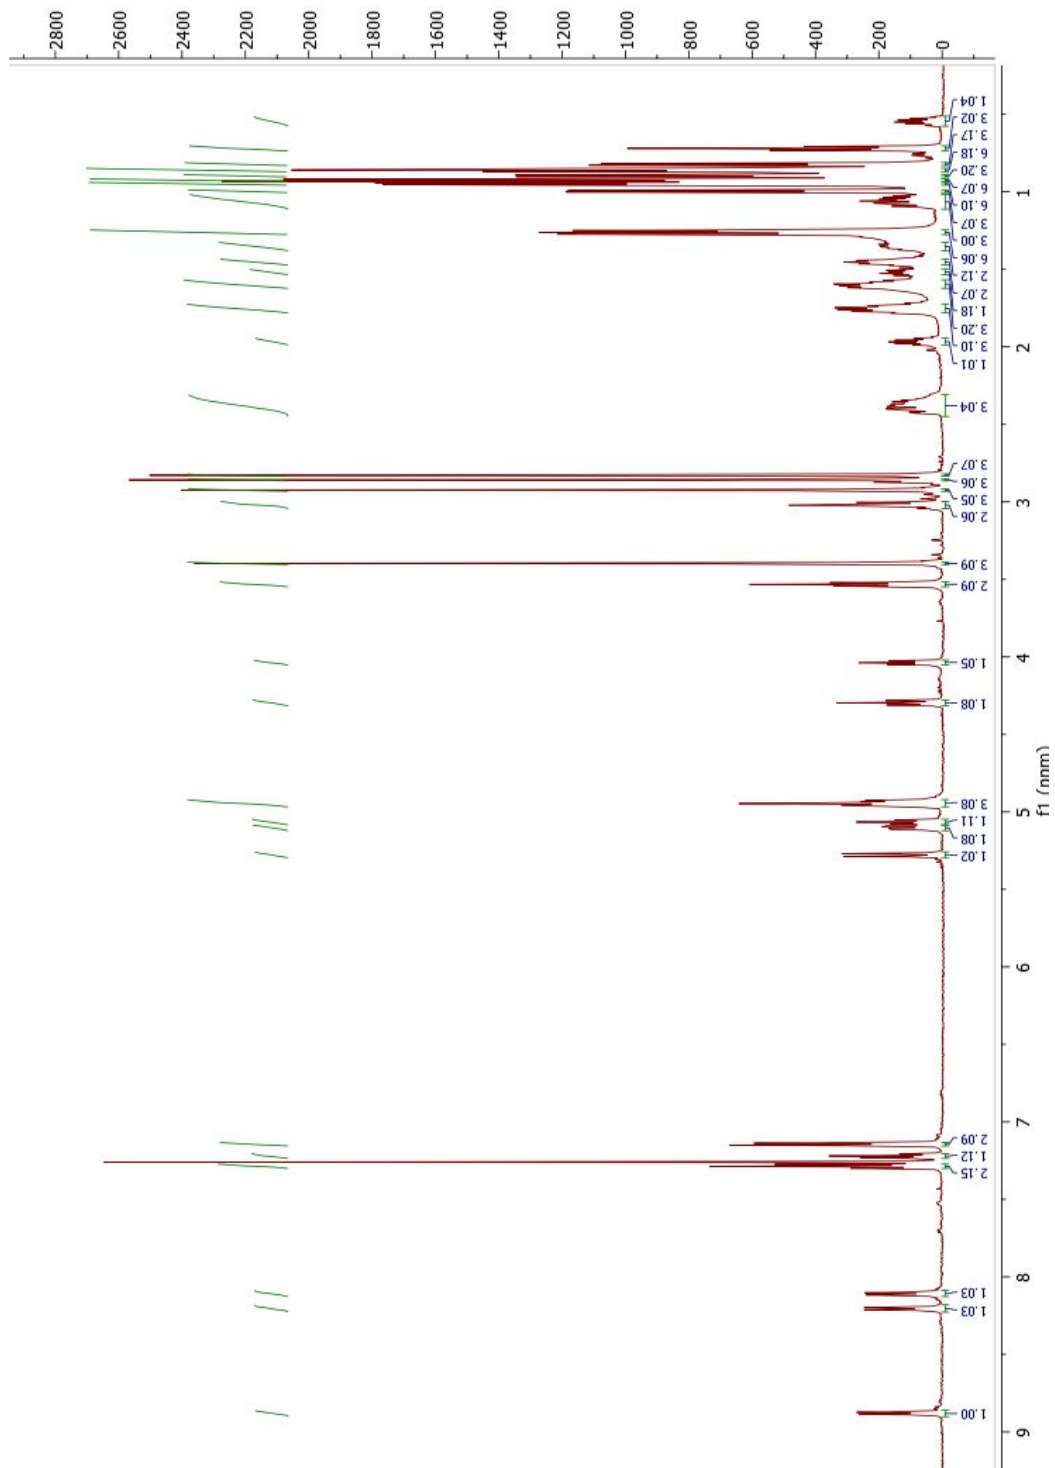

Figure S3.  $^1\text{H}$  NMR Spectrum of Broomeanamic

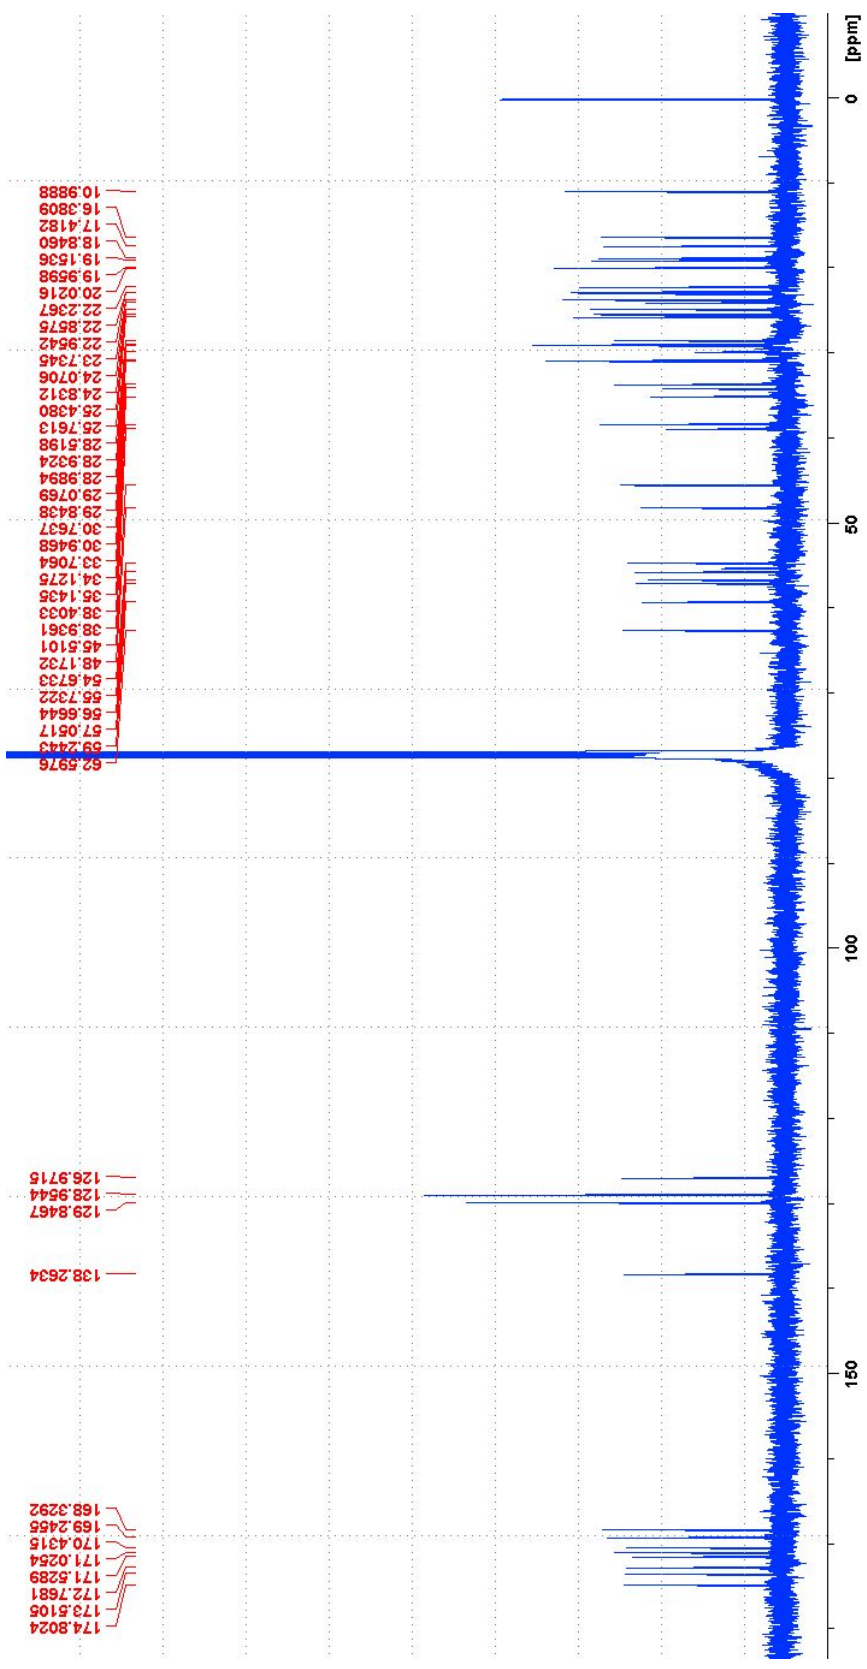

Figure S4.  $^{13}\text{C}$  NMR Spectrum of Broomeamide A (1)

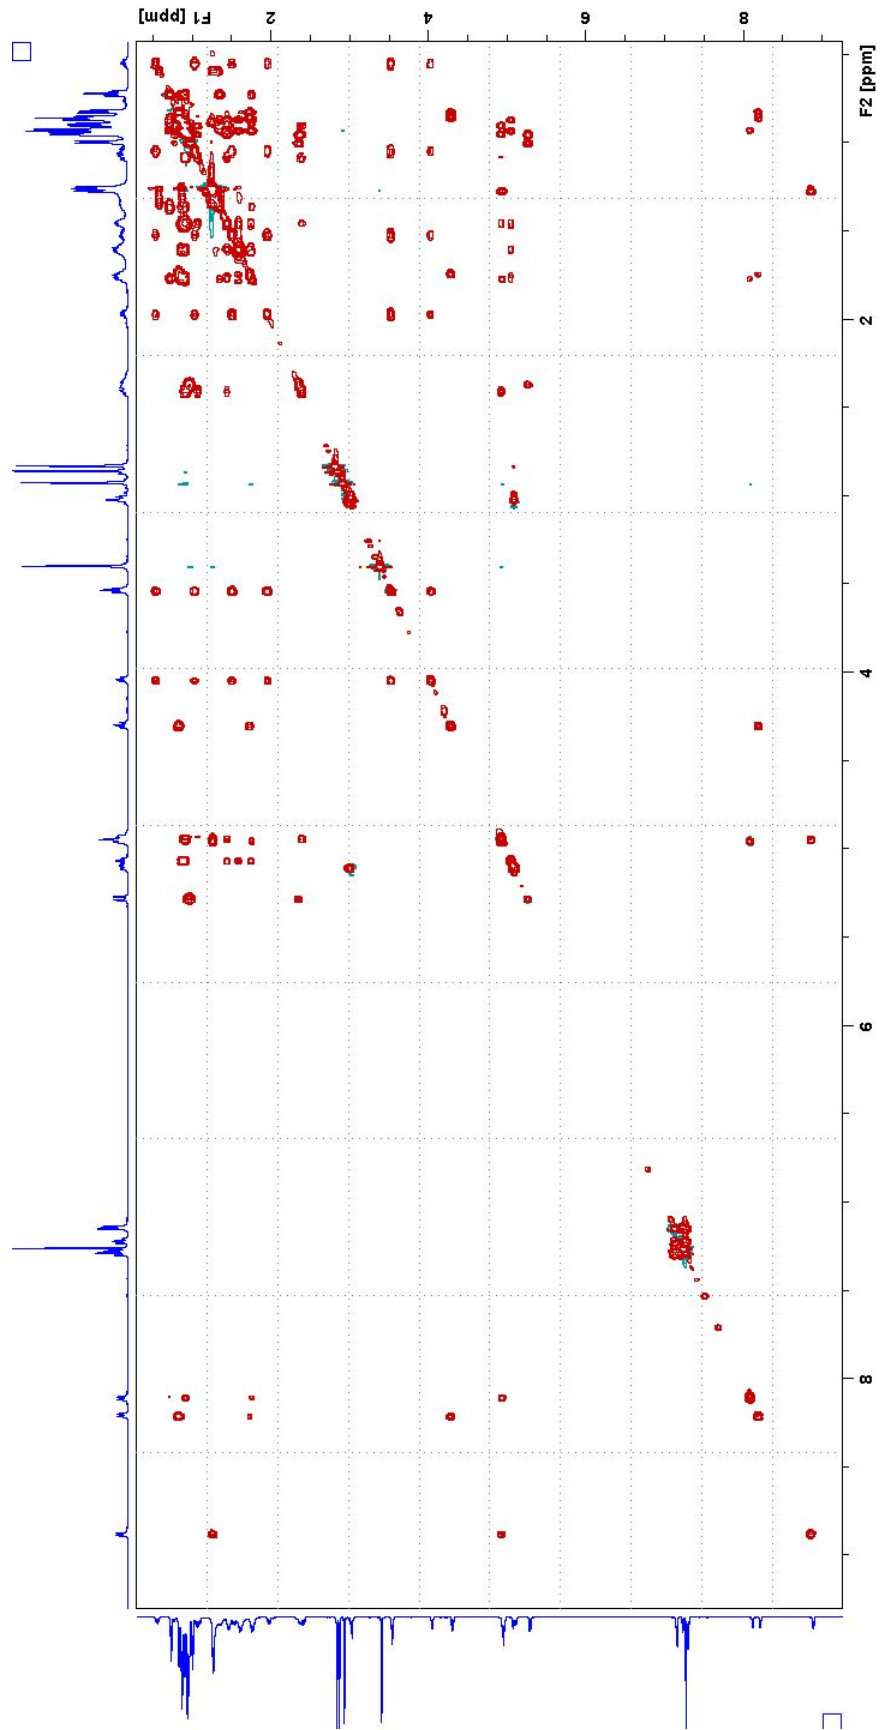

Figure S5. TOCSY Spectrum of Broomeamide A (1; 6)

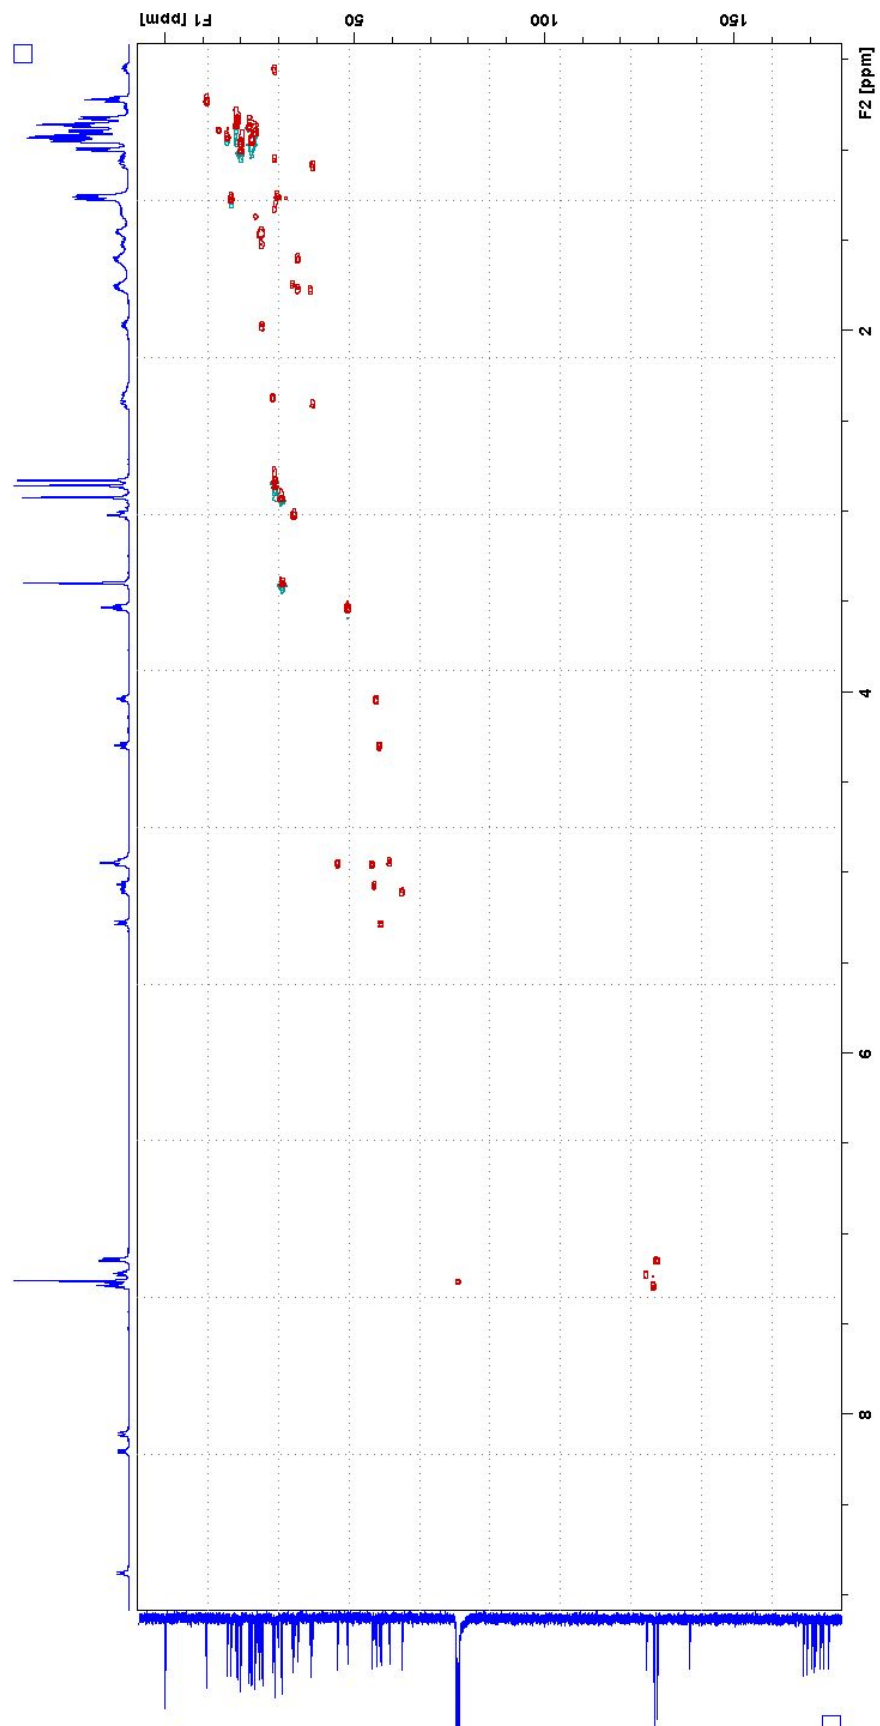

Figure S6. HSQC Spectrum of Broomeamide A (1; 600)



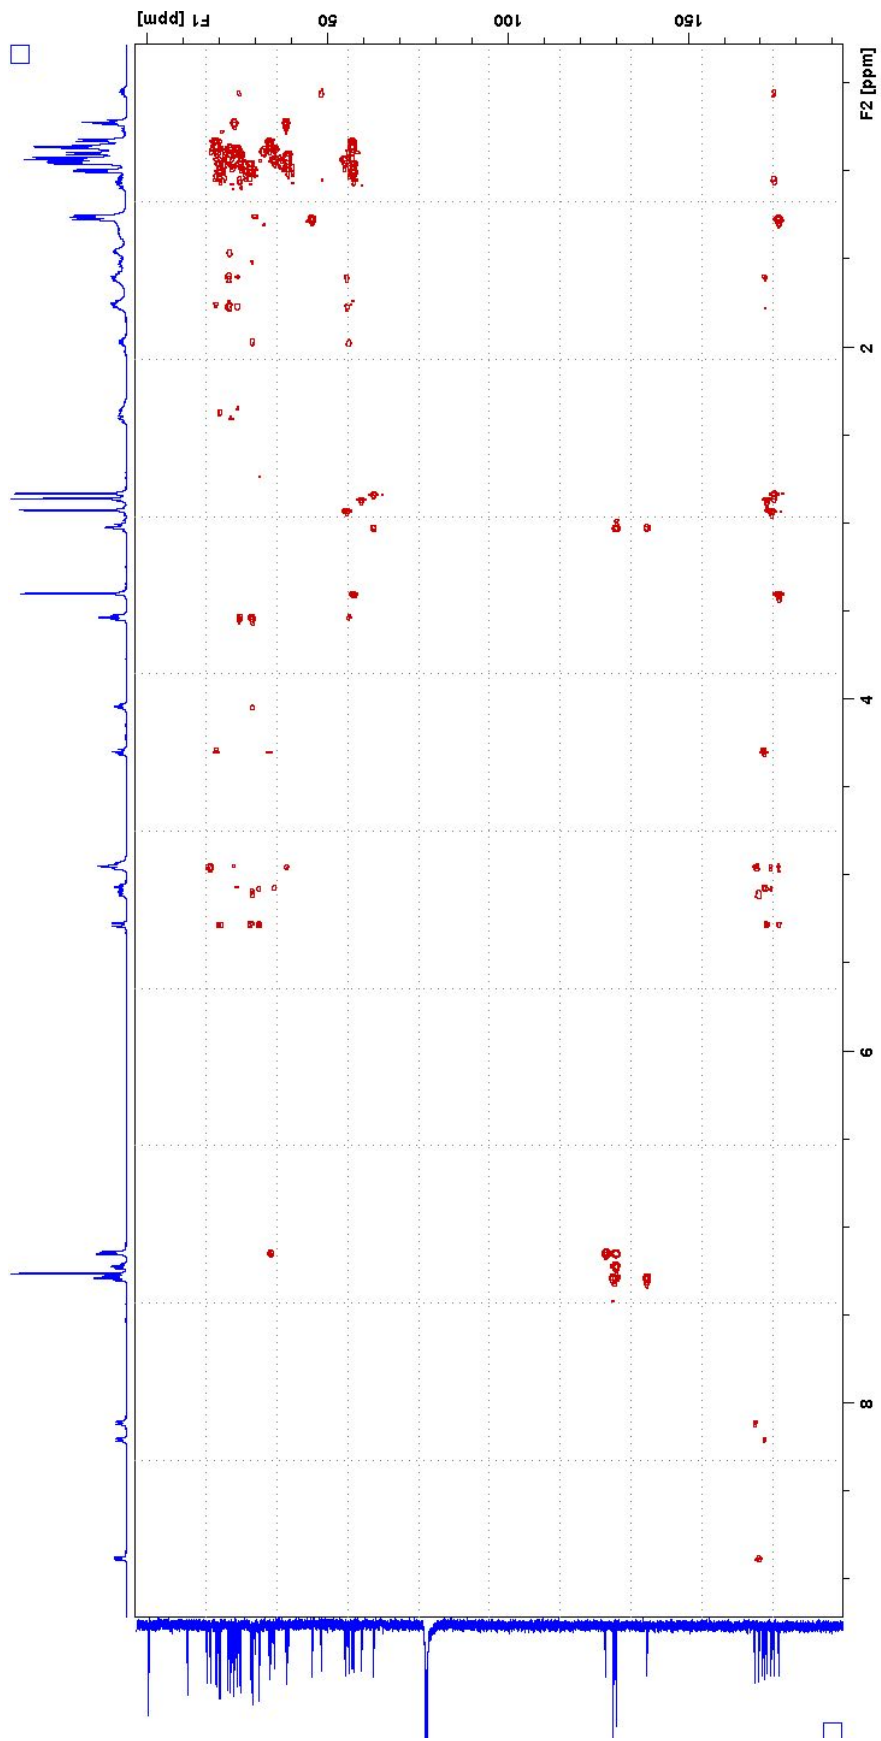

Figure S7. HMBC Spectrum of Broomeamide A (1; 60)

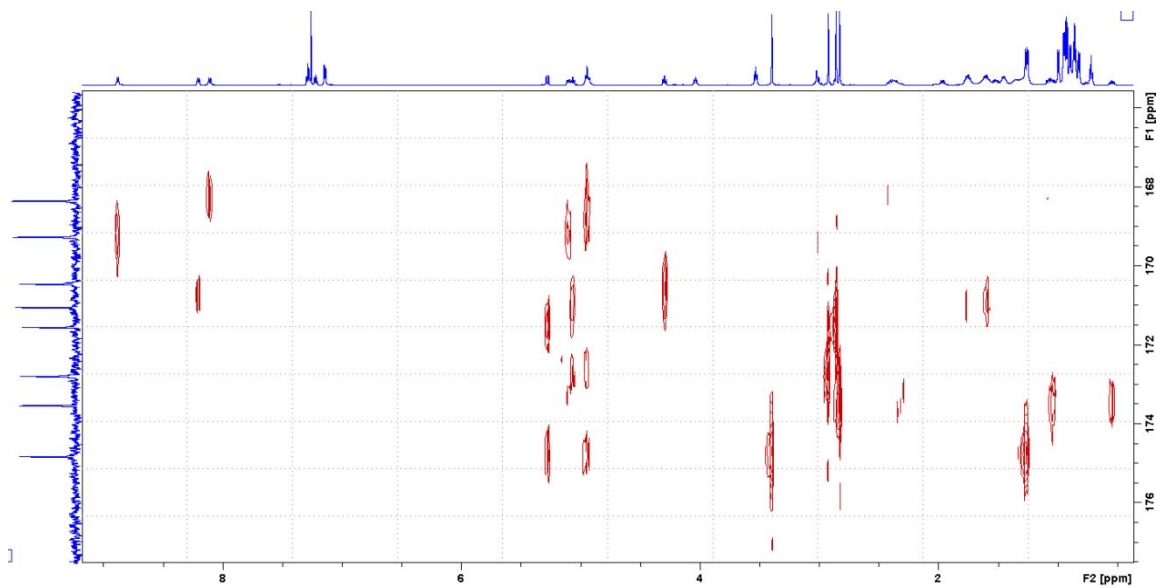

**Figure S8.** Expanded Carbonyl Region of the HMBC Spectrum of Broomeamide A (**1**; 600 MHz, CDCl<sub>3</sub>)

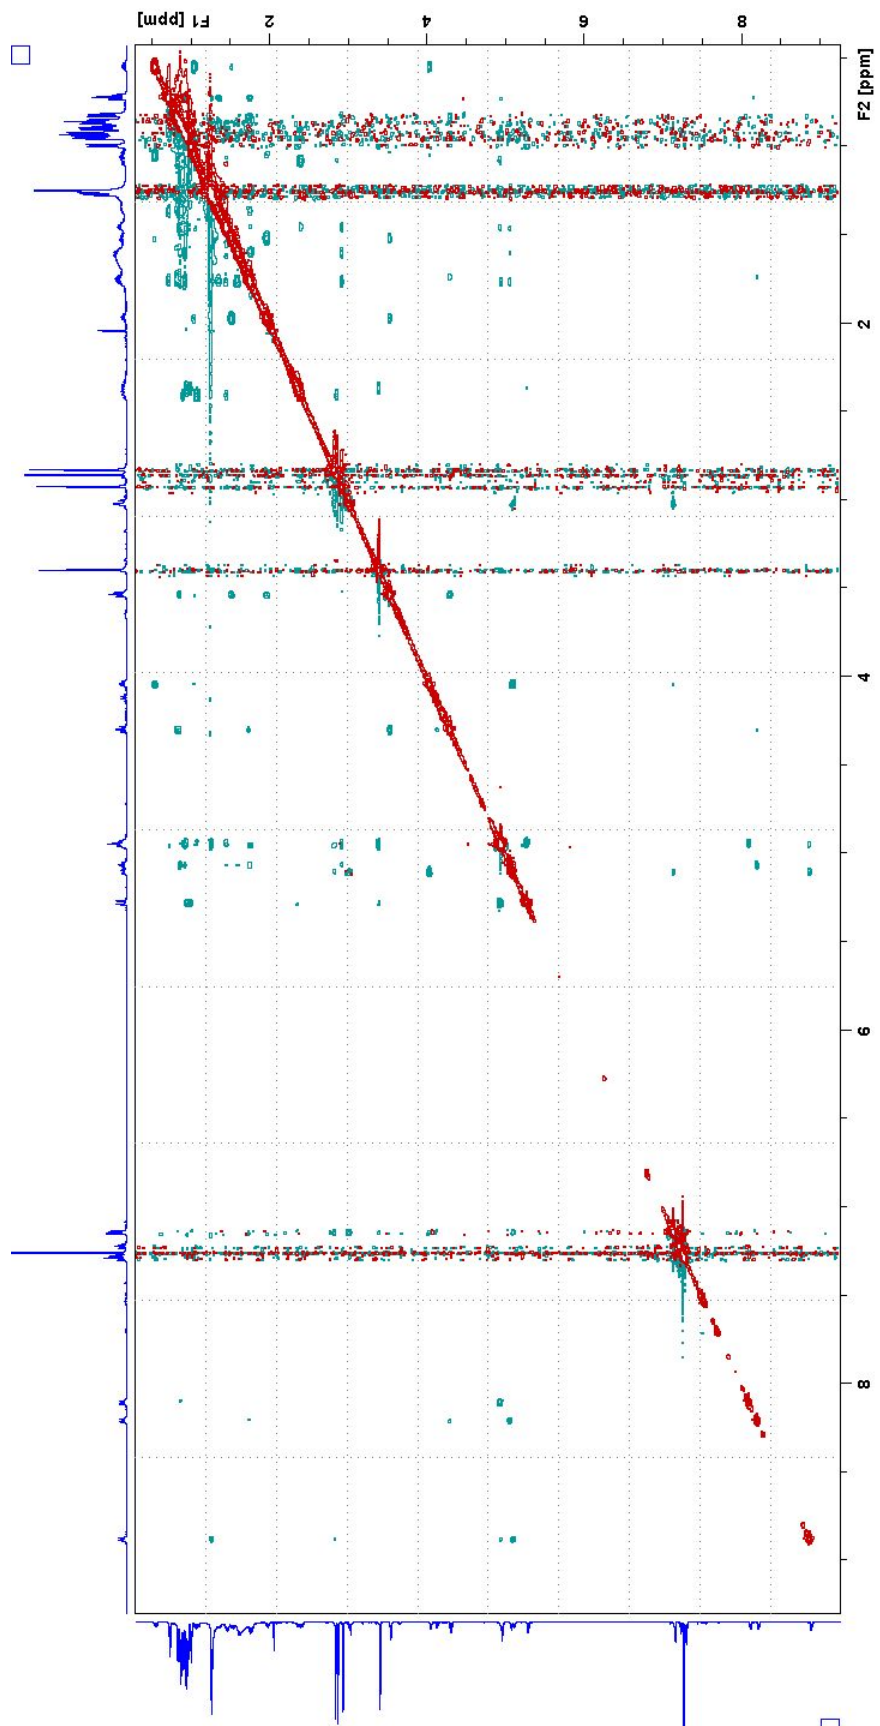

Figure S9. ROESY Spectrum of Broomeamide A (1; 6)

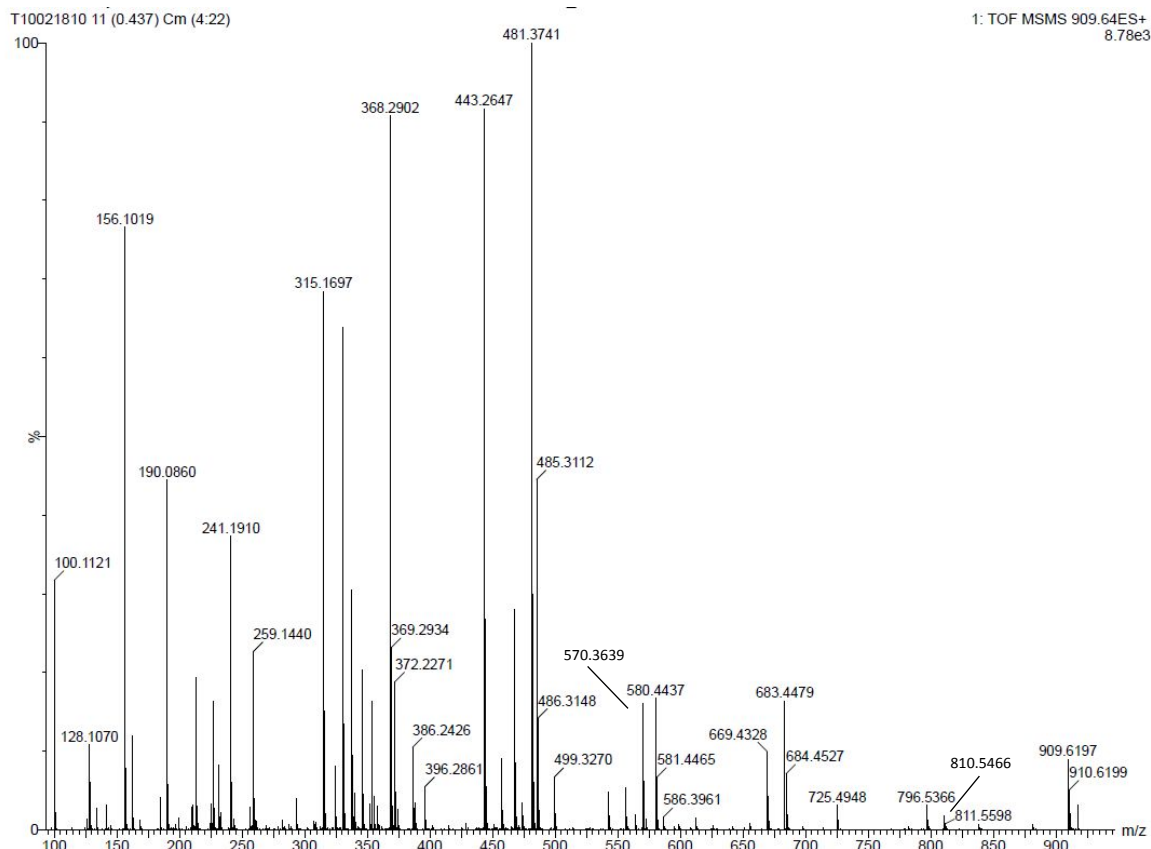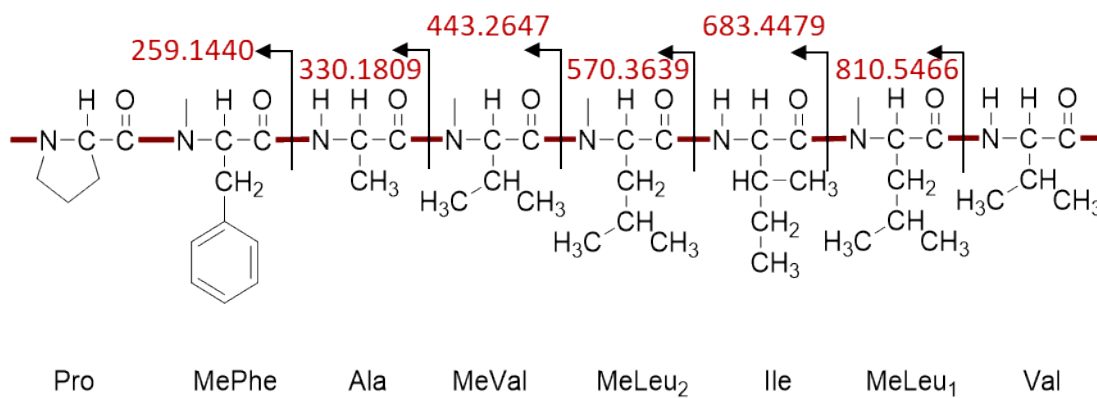

**Figure S10.** HRESIMSMS data for Broomeanamide A (1)

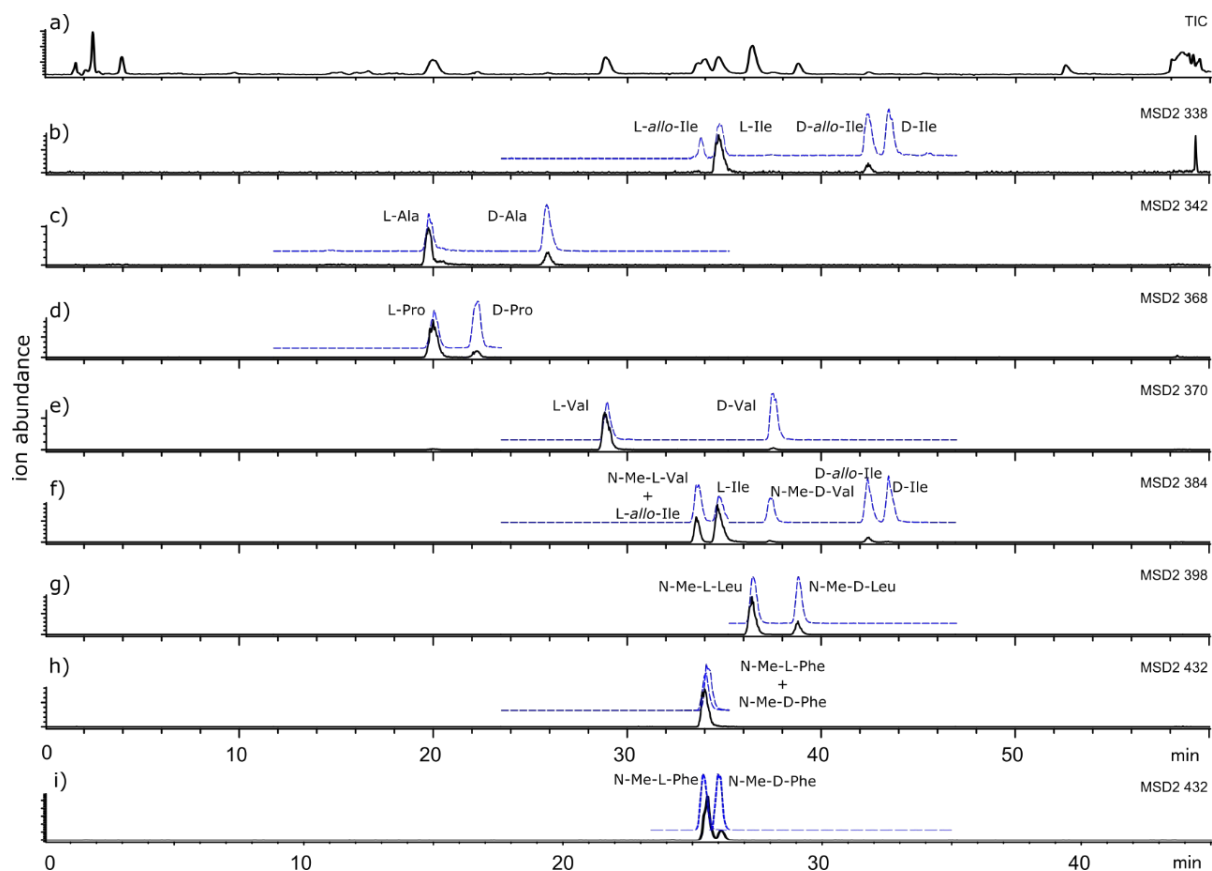

a) Total Ion Chromatogram using  $C_3$  column; b) EIC (extracted ion current;  $m/z$  338) for L-FDAA-L-Ile; c) EIC ( $m/z$  342) for L-FDAA-L-Ala; d) EIC ( $m/z$  368) for L-FDAA-L-Pro; e) EIC ( $m/z$  370) for L-FDAA-L-Val; f) EIC ( $m/z$  384) for L-FDAA-N-Me-L-Val (note the co-extraction of ions for the isomeric Ile residues); g) EIC ( $m/z$  396) for L-FDAA-N-Me-L-Leu; h) EIC ( $m/z$  432) for L-FDAA-N-Me-L-Phe; i) EIC spectrum ( $m/z$  432) from  $C_{18}$  Marfey's analysis of **1** for characterization of L-FDAA-N-Me-L-Phe. For b)-i), L-FDAA derivatives of D- and L-amino acid standards are displayed as blue dotted lines.

**Figure S11.** HPLC-MS data from Marfey's analysis of **1**.

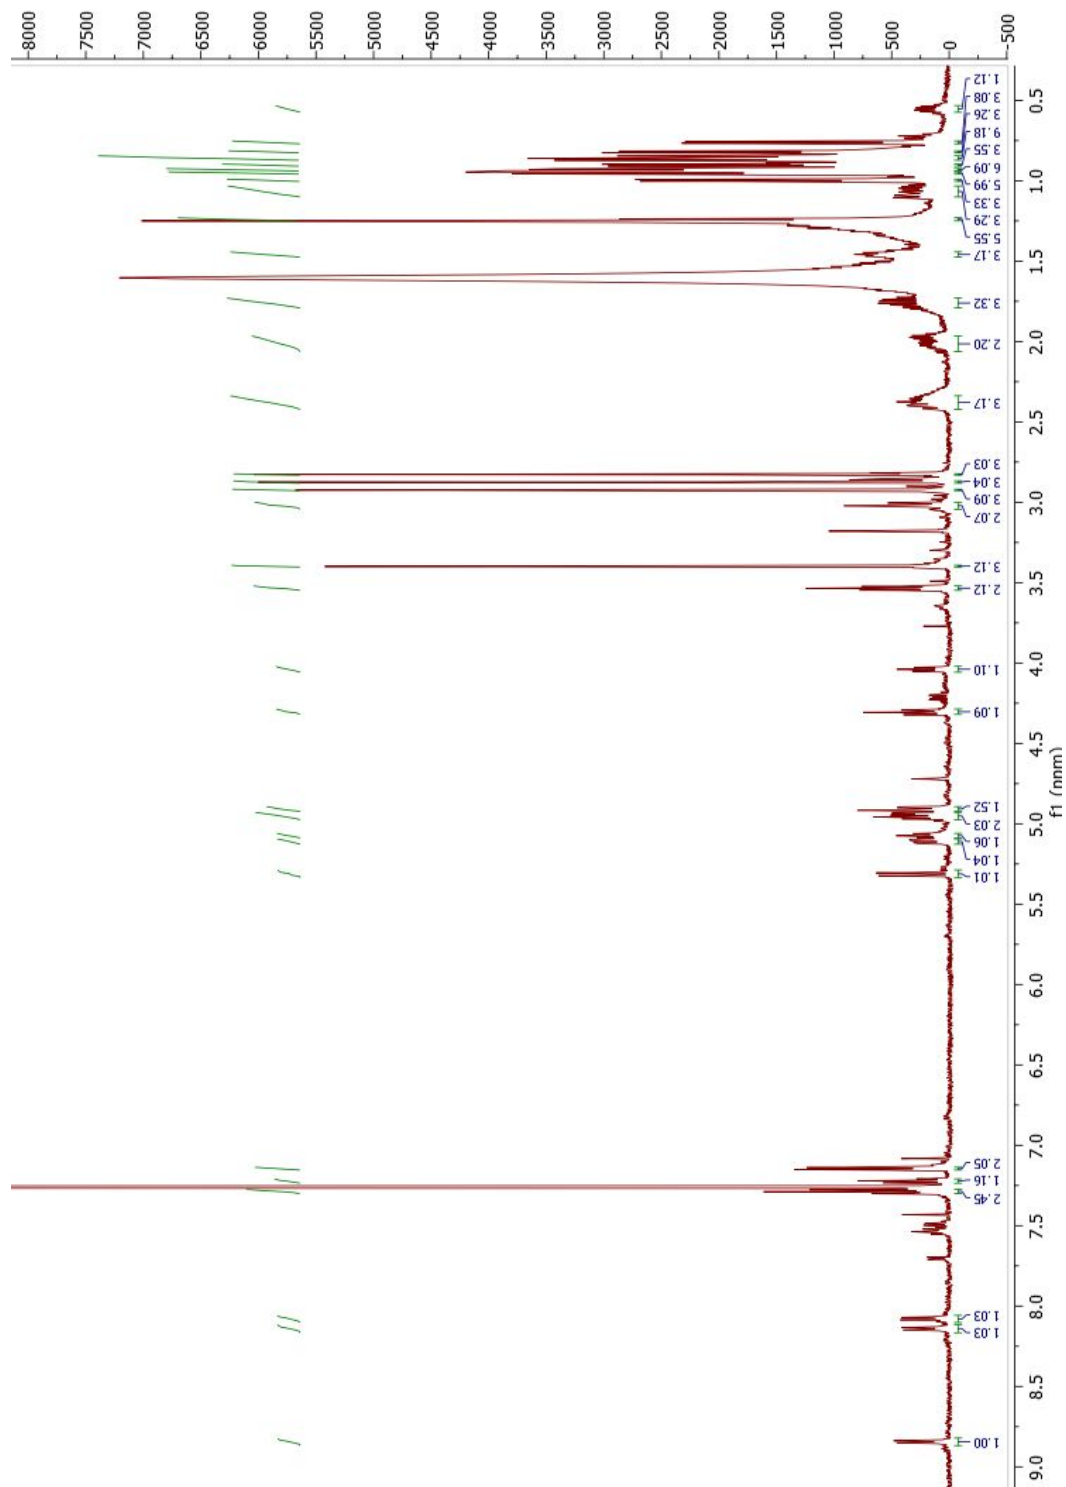

Figure S12.  $^1\text{H}$  NMR Spectrum of Broom

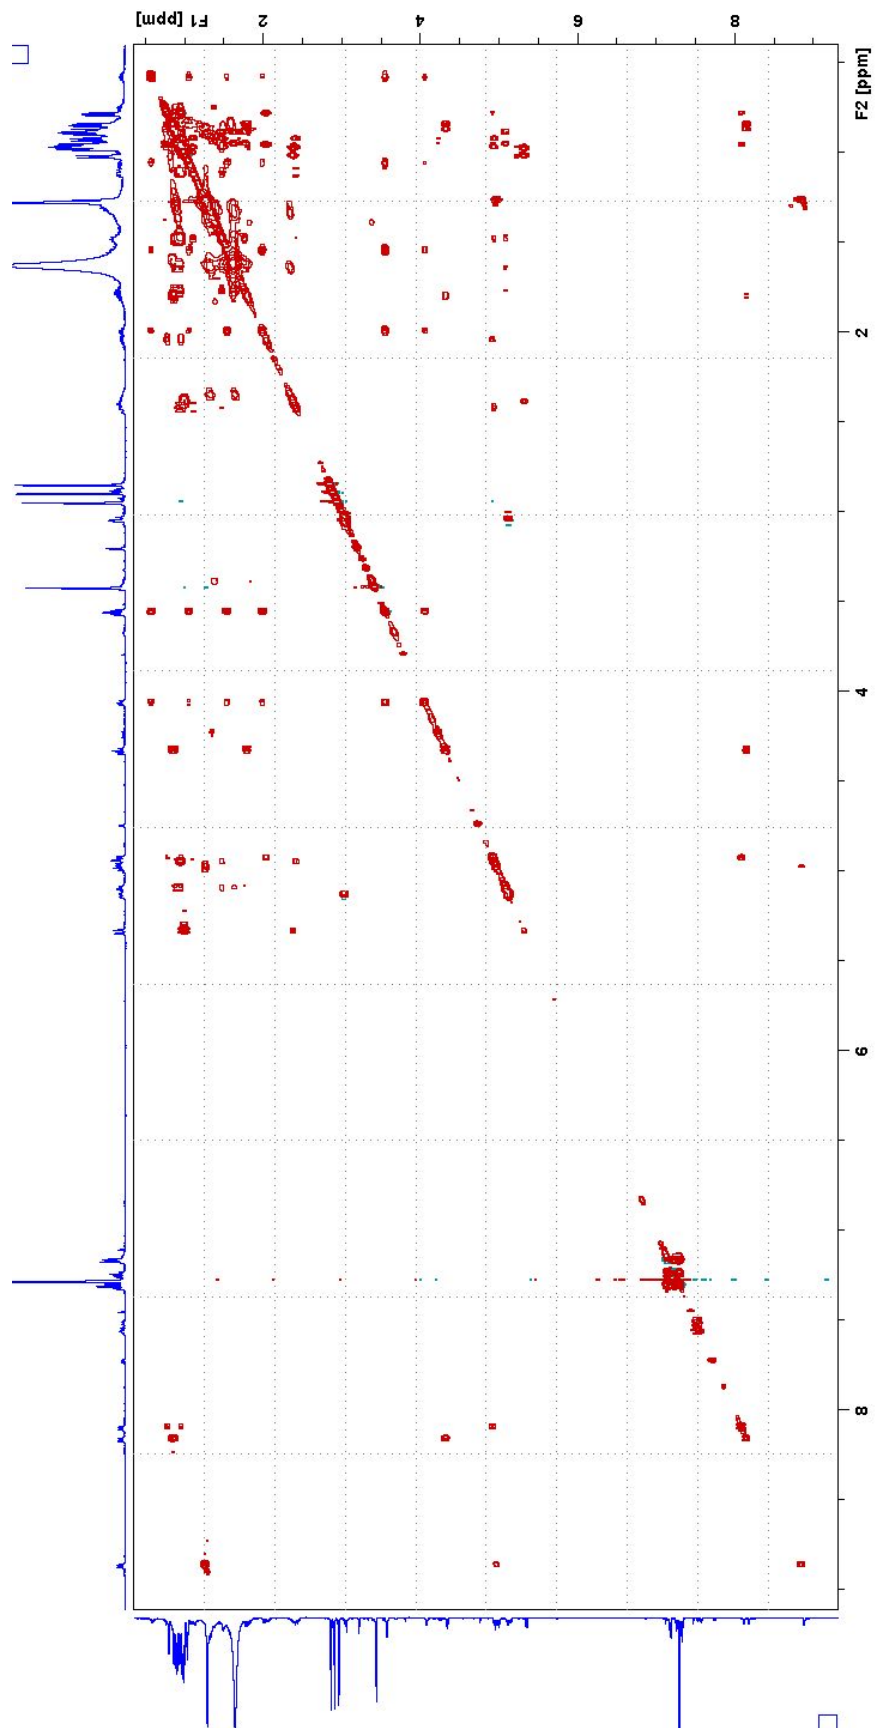

Figure S13. TOCSY Spectrum of Broomeamide B (2)

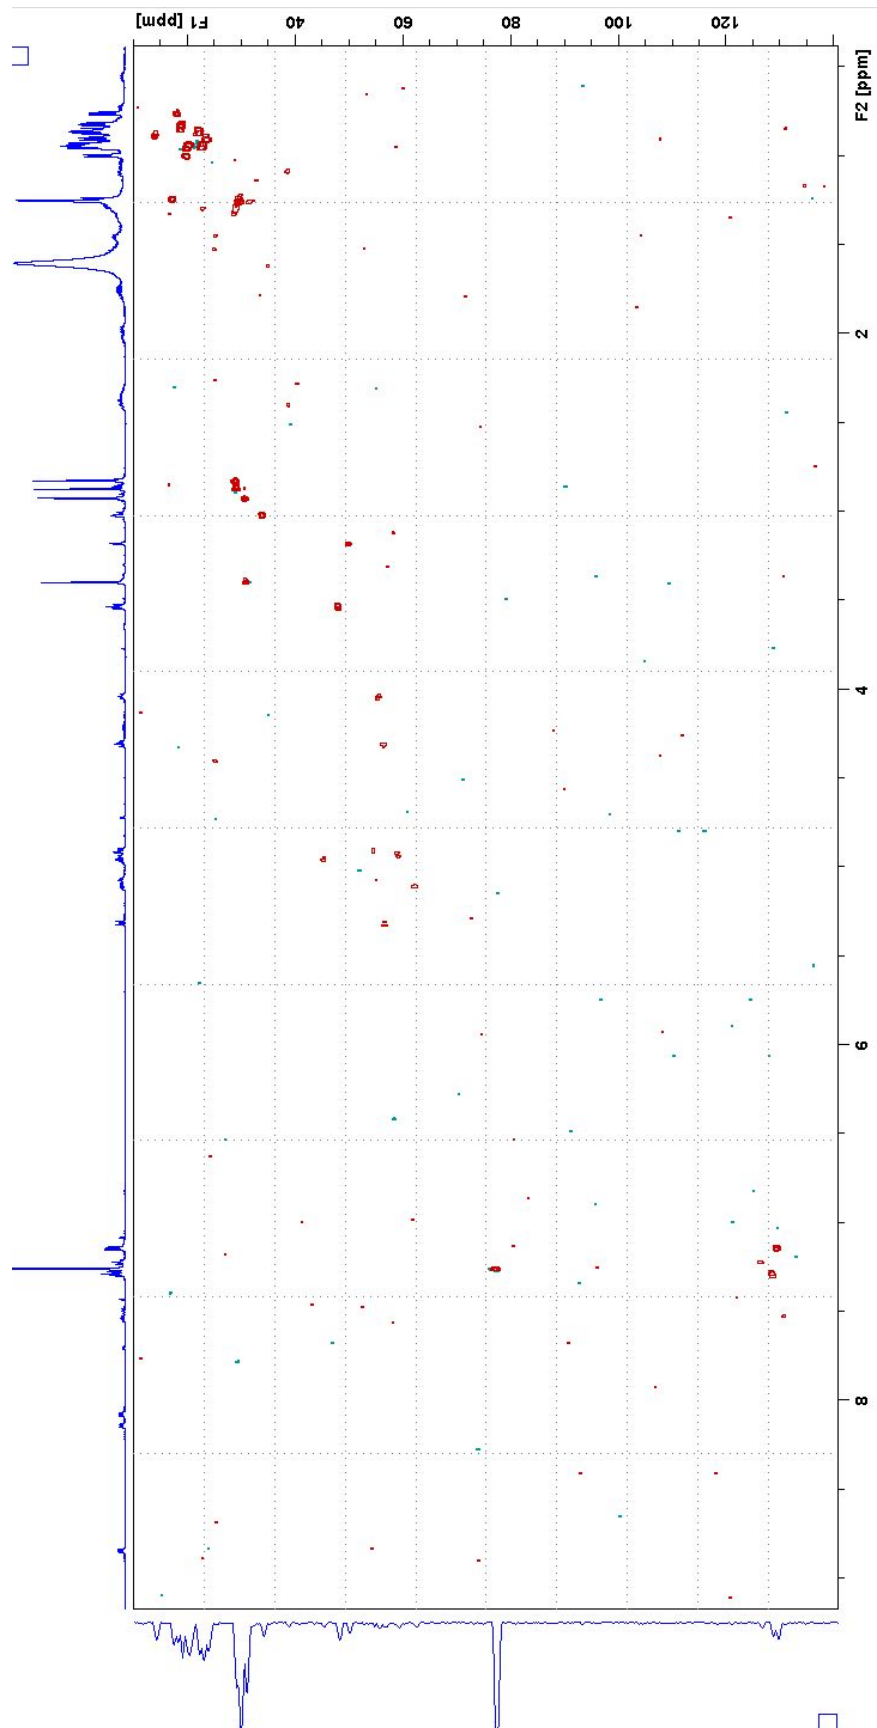

Figure S14. HSQC Spectrum of Broomeamide B (2; 5)



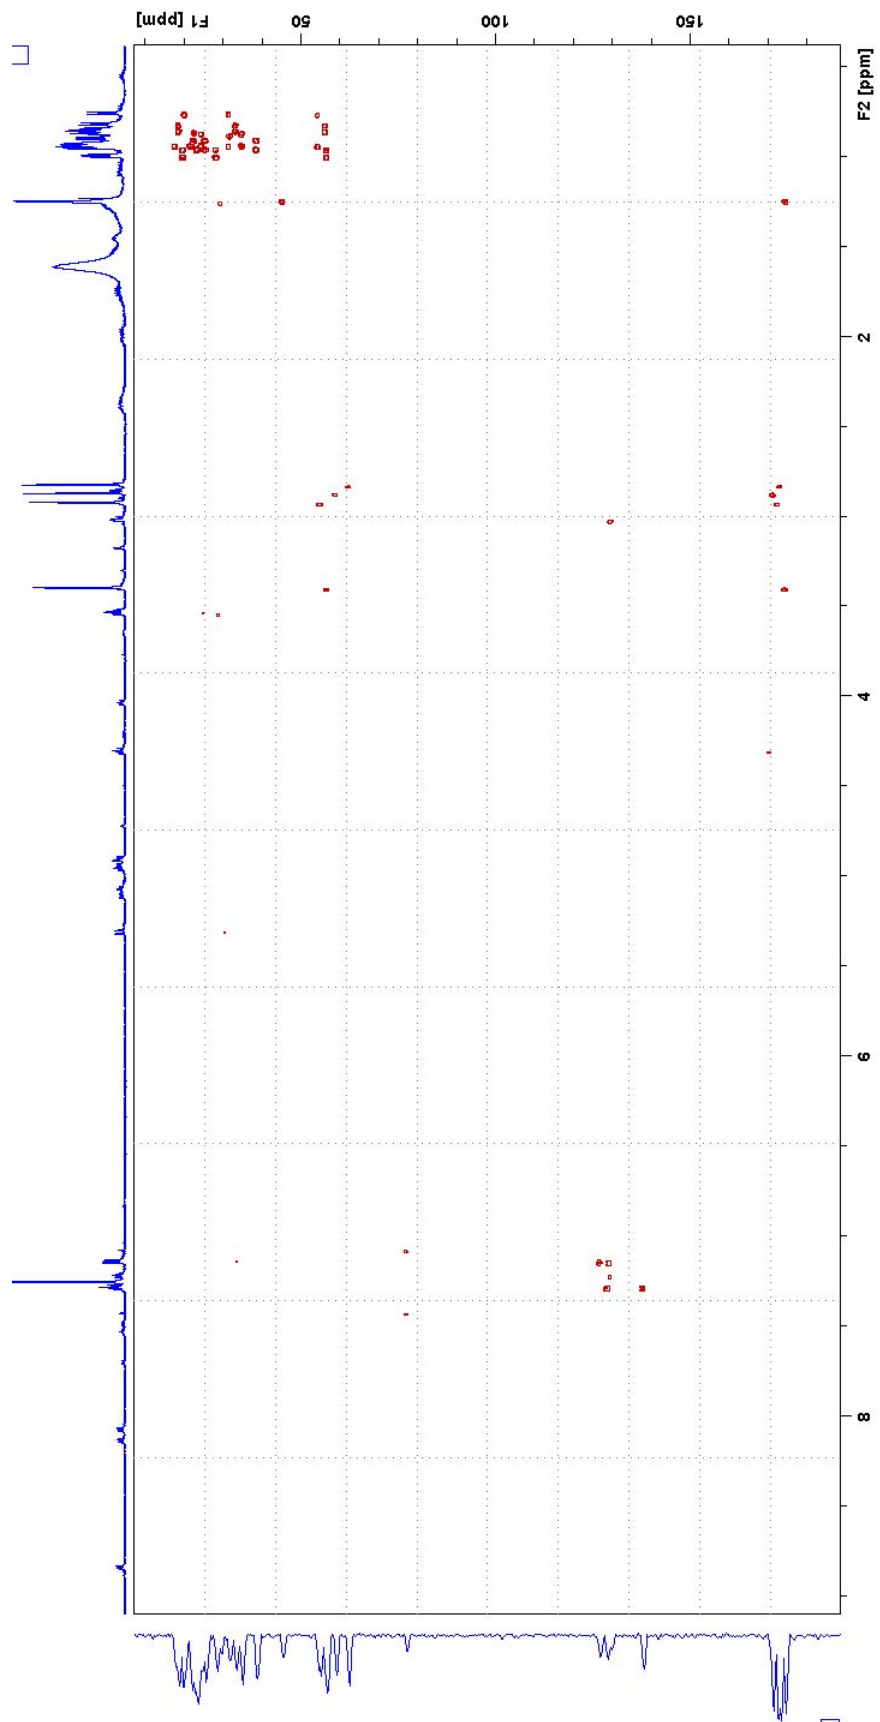

Figure S15. HMBC Spectrum of Broomeamide B (2);

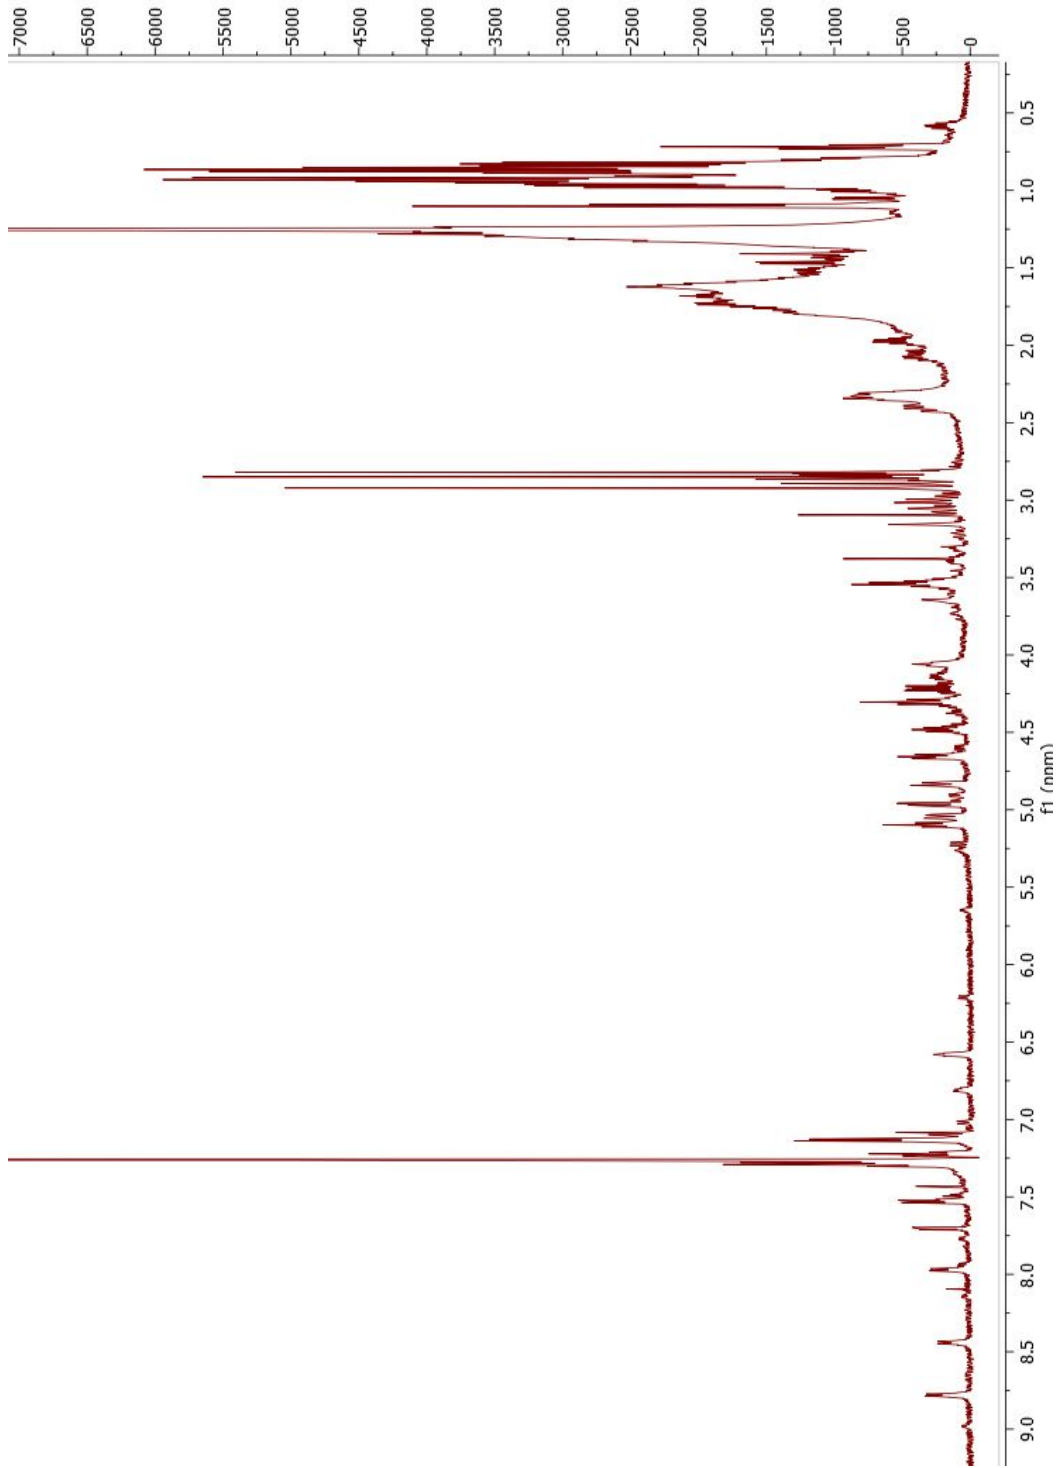

**Figure S16.**  $^1\text{H}$  NMR Spectrum of Broomea

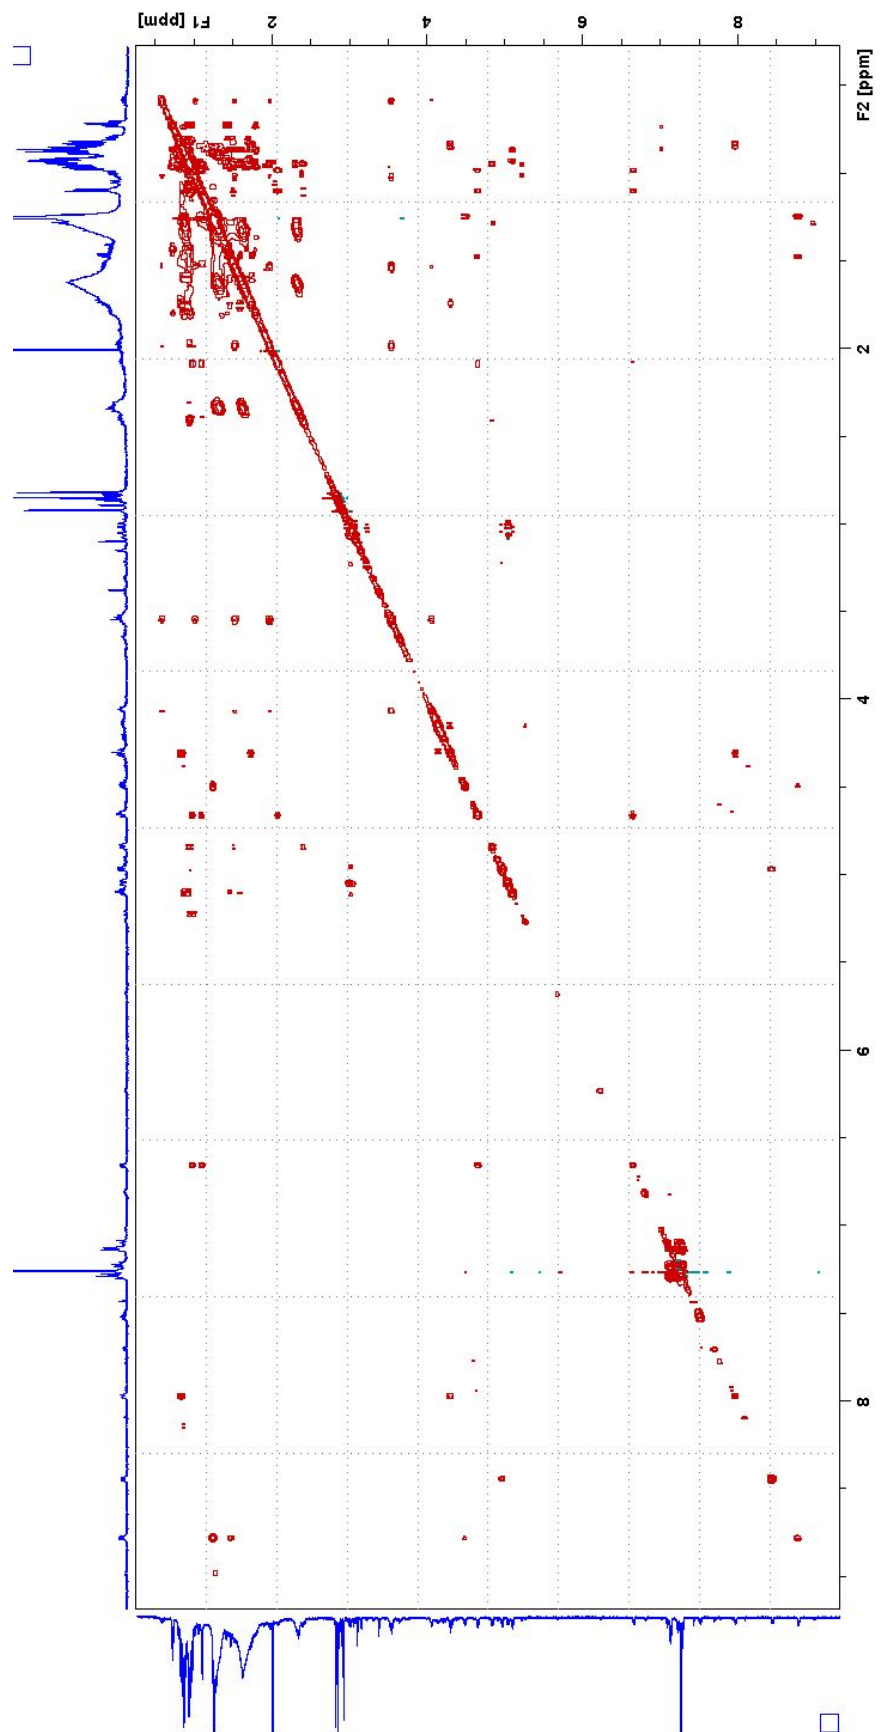

Figure S17. TOCSY Spectrum of Broomeamide C (3);

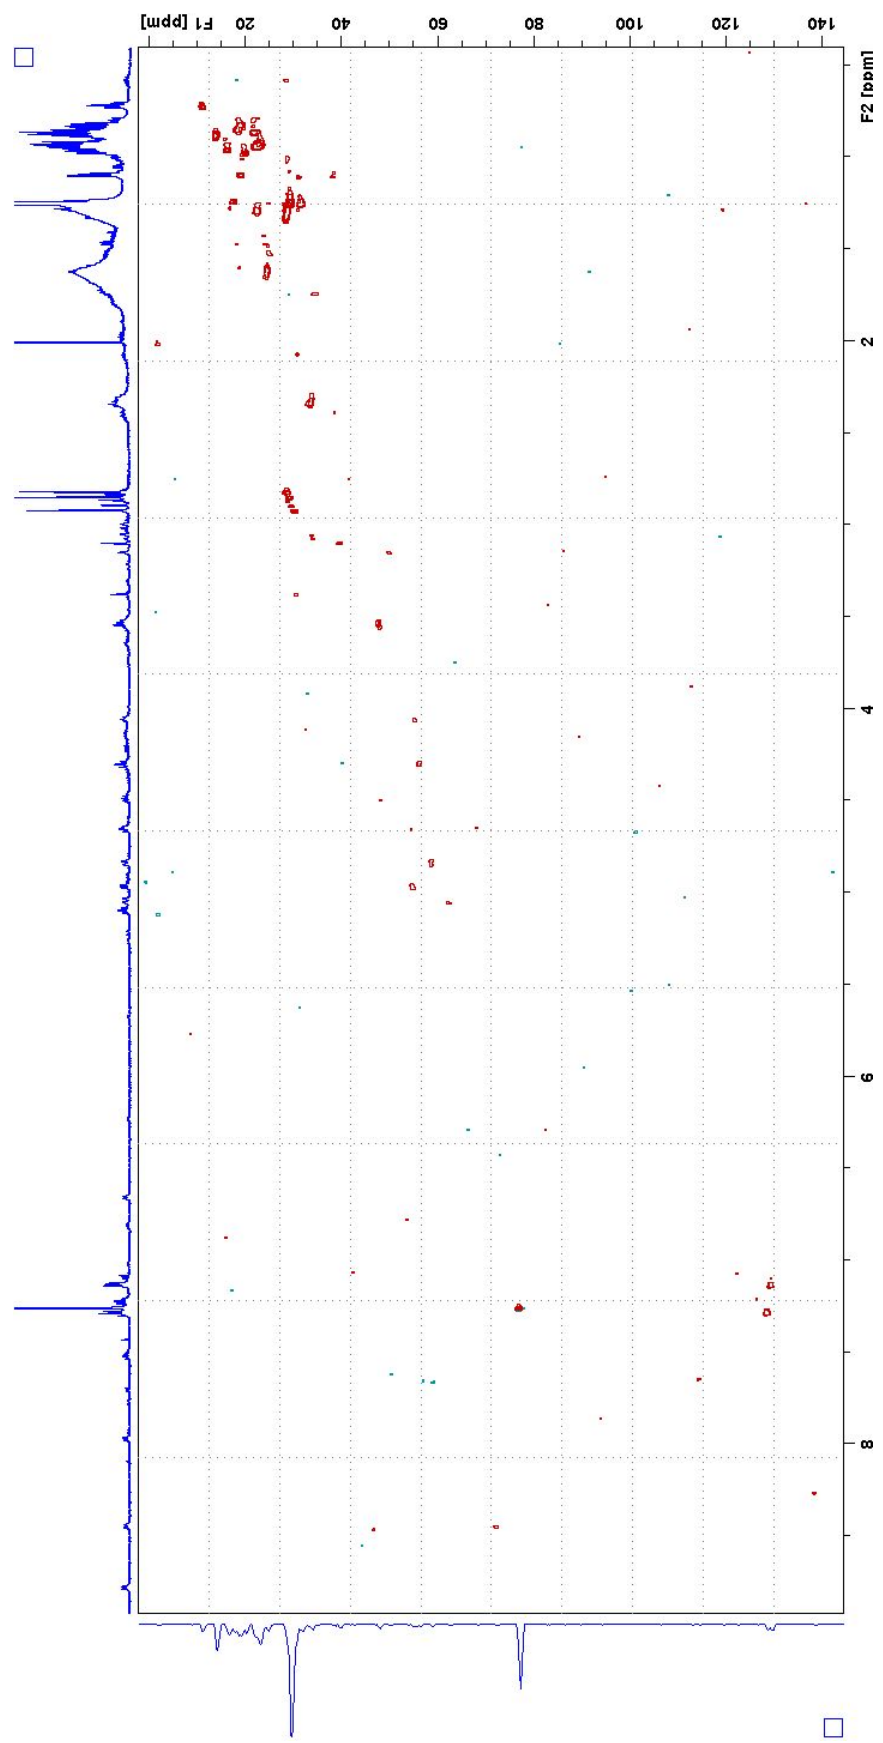

Figure S18. HSQC Spectrum of Broomeamide C (3; 5)

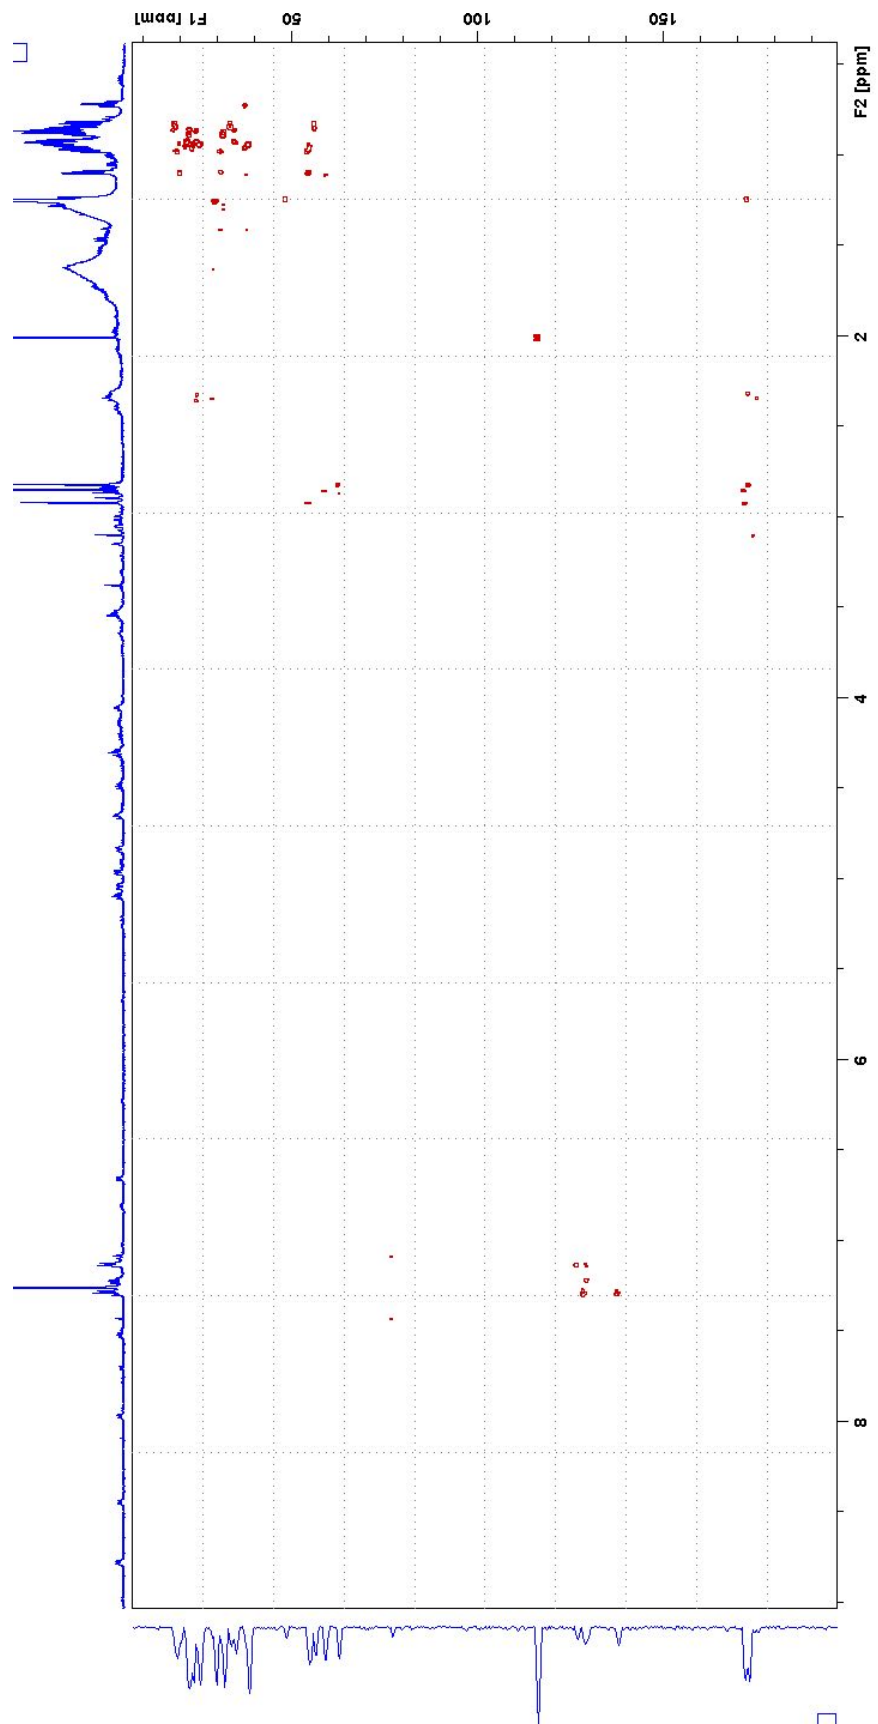

**Figure S19.** HMBC Spectrum of Broomeamide C (3);

*S. aureus* 23°C

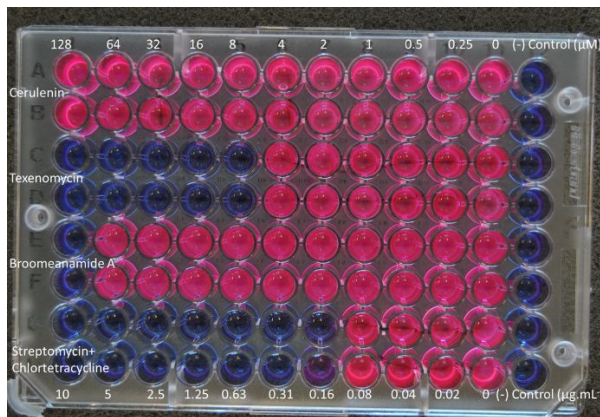

*C. albicans* 23°C

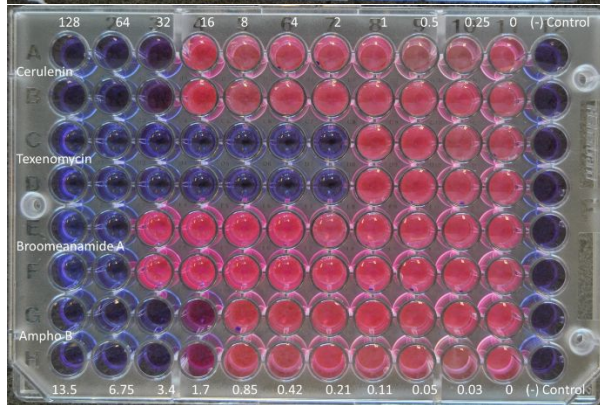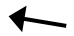

*C. neoformans* 23°C

*C. neoformans* 37°C

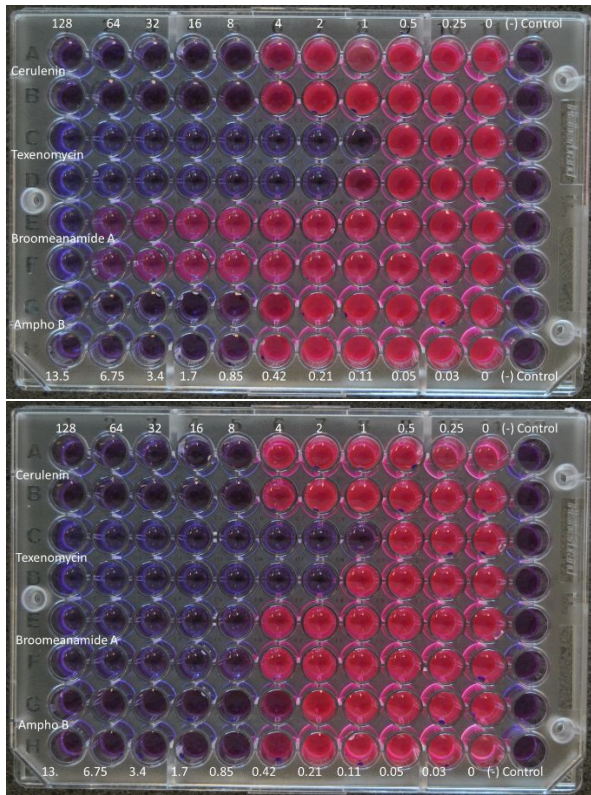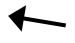

**Figure S20.** MIC data

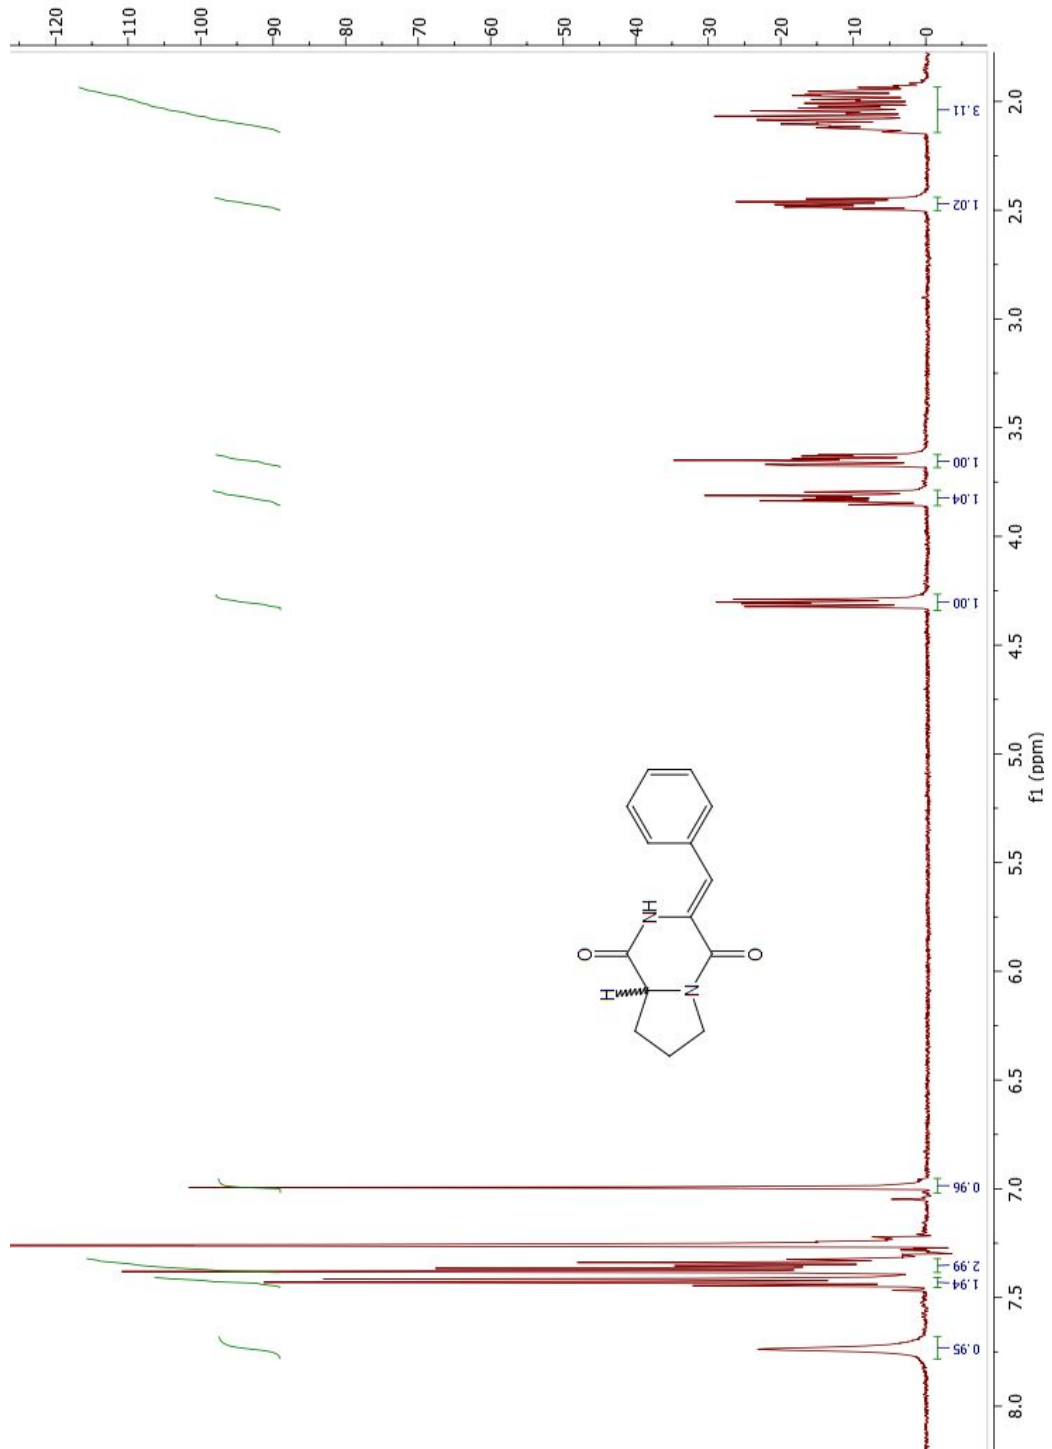

**Figure S21.** <sup>1</sup>H NMR Spectrum of **4** (600 MHz, CDCl<sub>3</sub>)



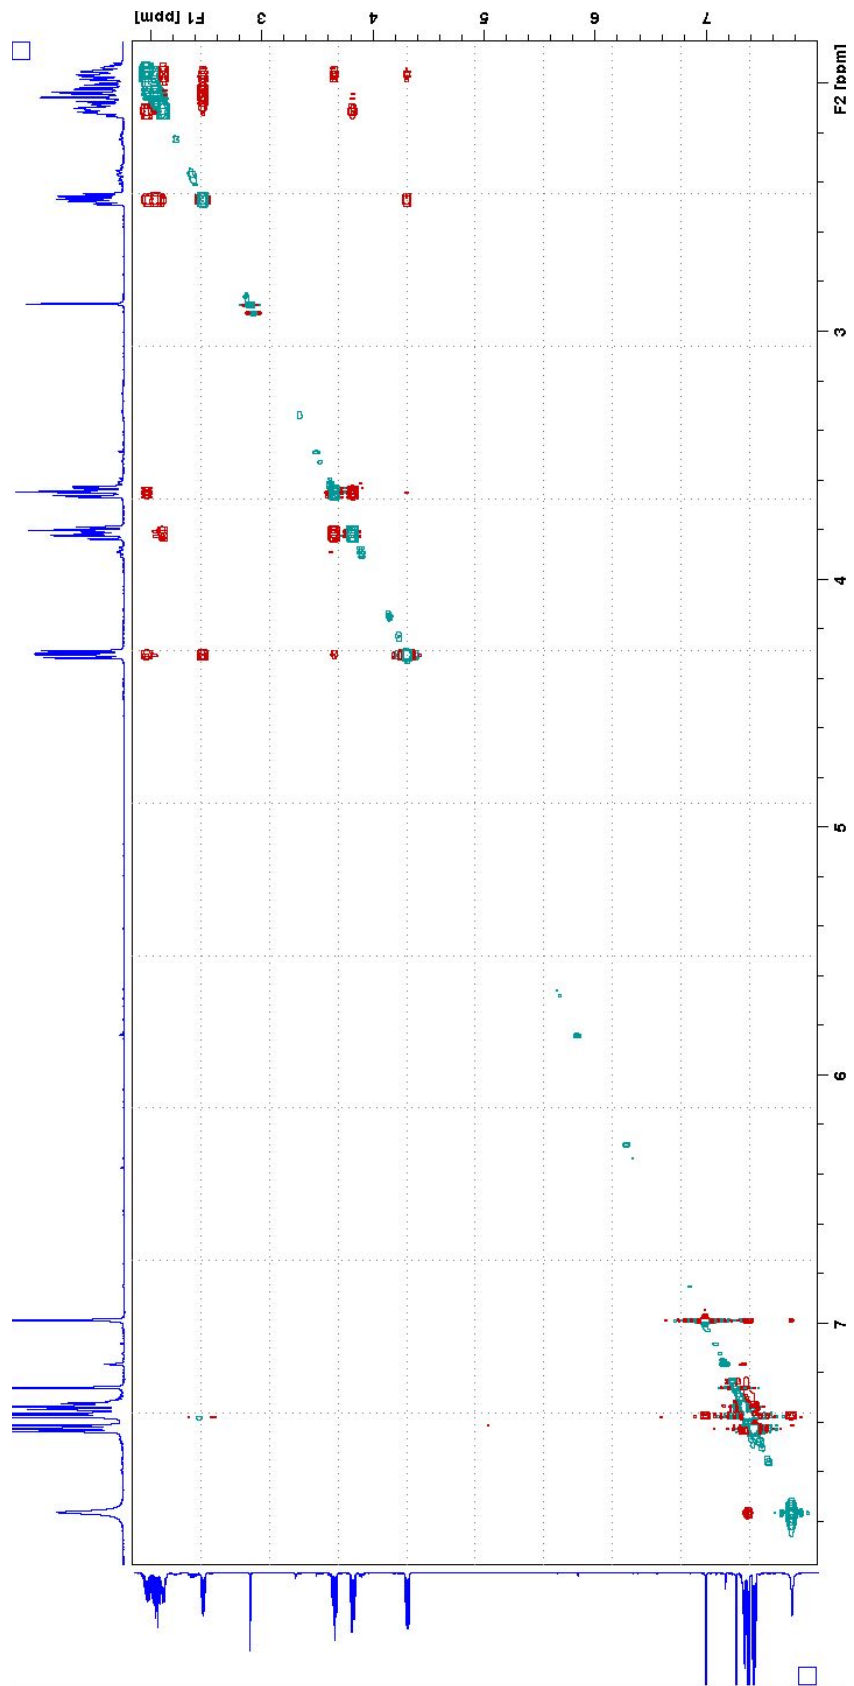

**Figure S22.** NOESY Spectrum of **4** (150 MHz, CDCl<sub>3</sub>)

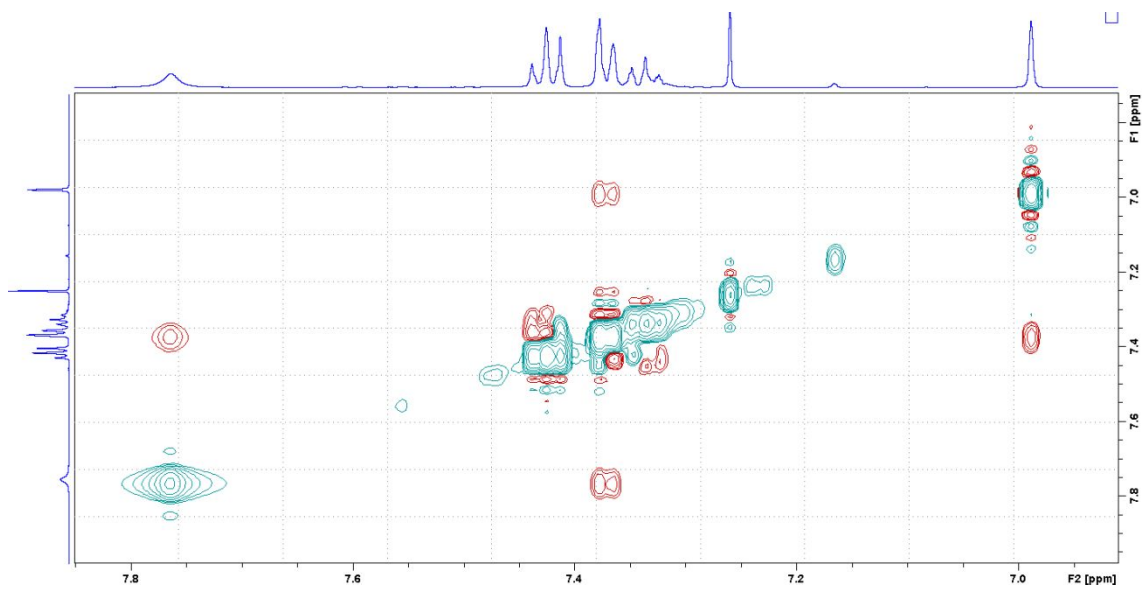

**Figure S23.** Expanded Aromatic Region of the NOESY Spectrum of **4** (**4**; 600 MHz, CDCl<sub>3</sub>)

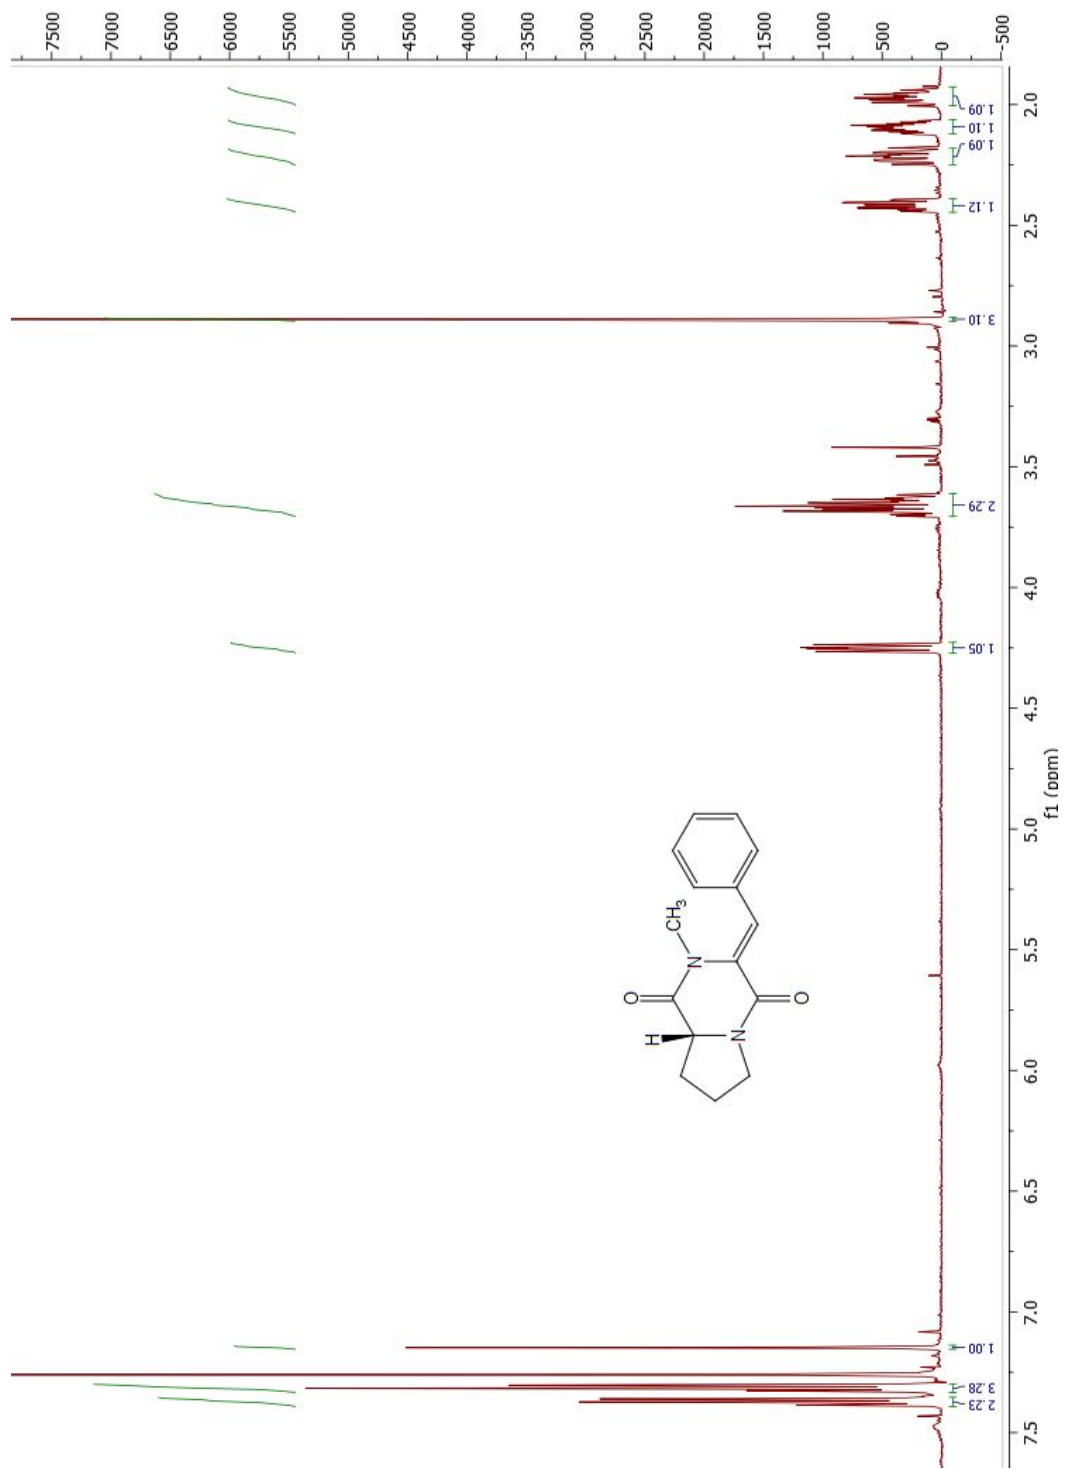

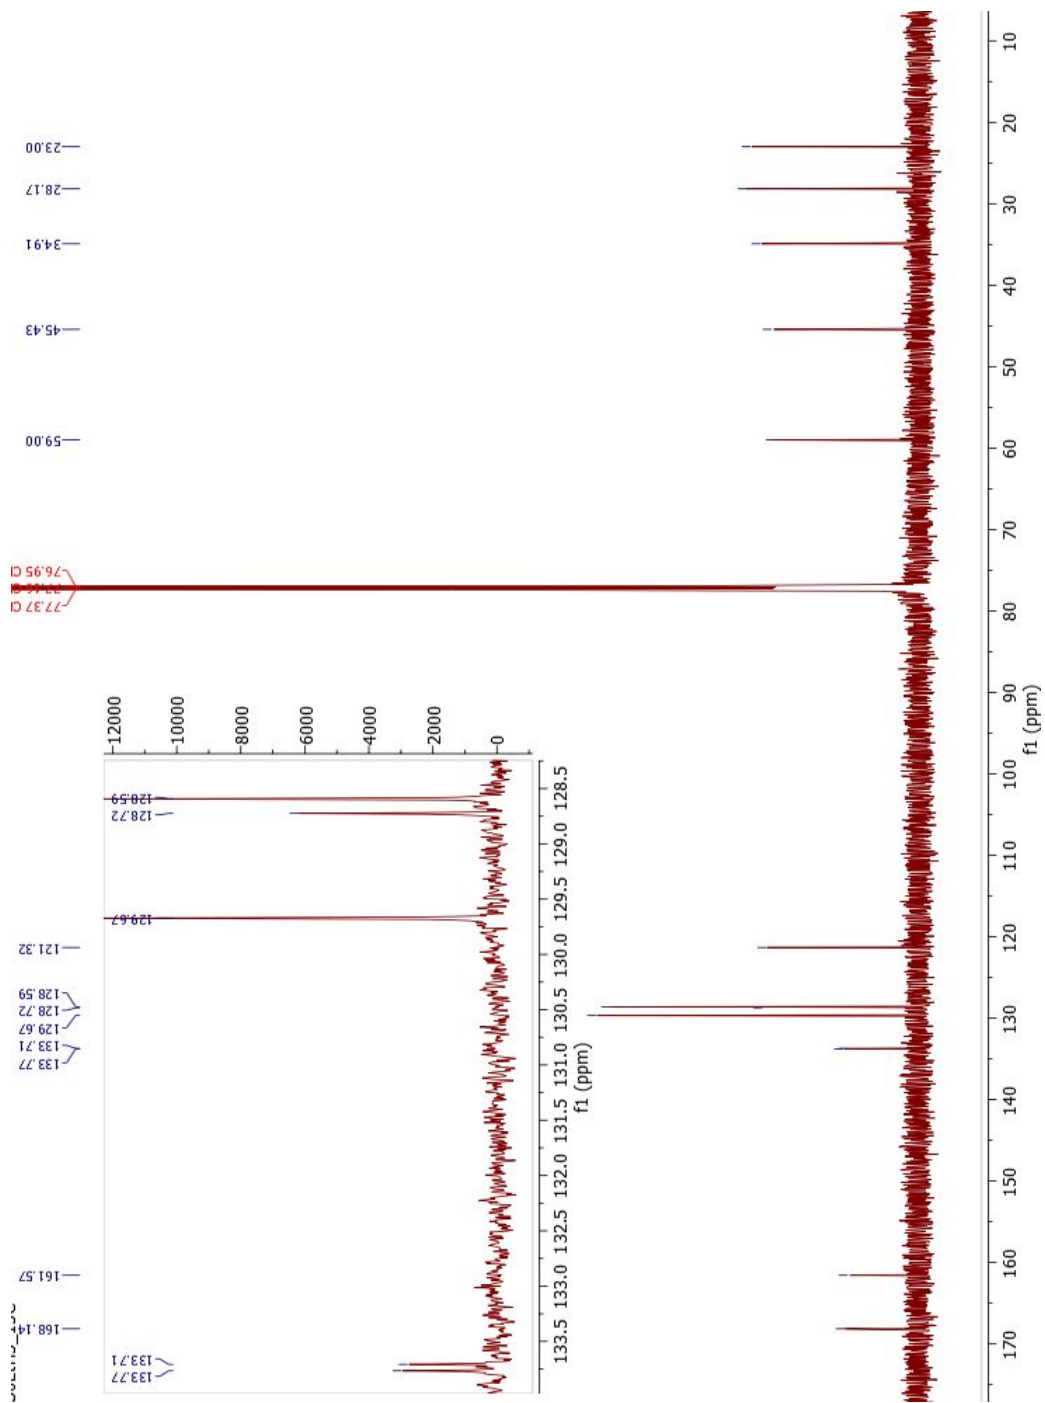

Figure S25.  $^{13}\text{C}$  NMR Spectrum of 5 (150 MHz,

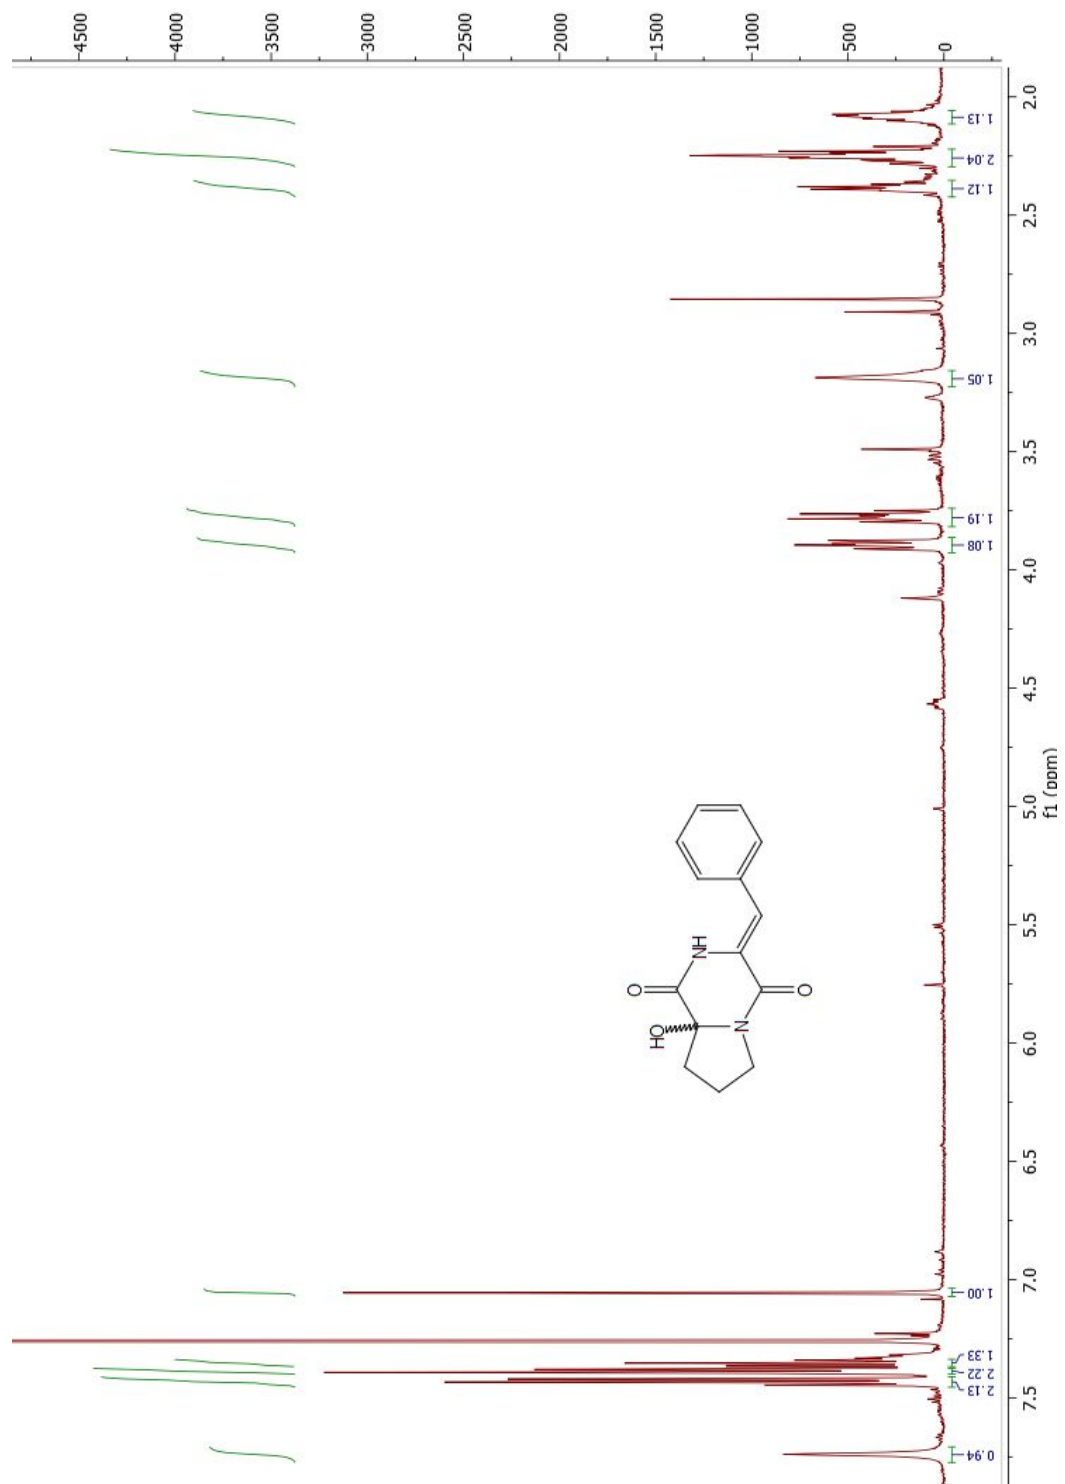

**Figure S26.**  $^1\text{H}$  NMR Spectrum of **6** (600 MHz,  $\text{CDCl}_3$ )

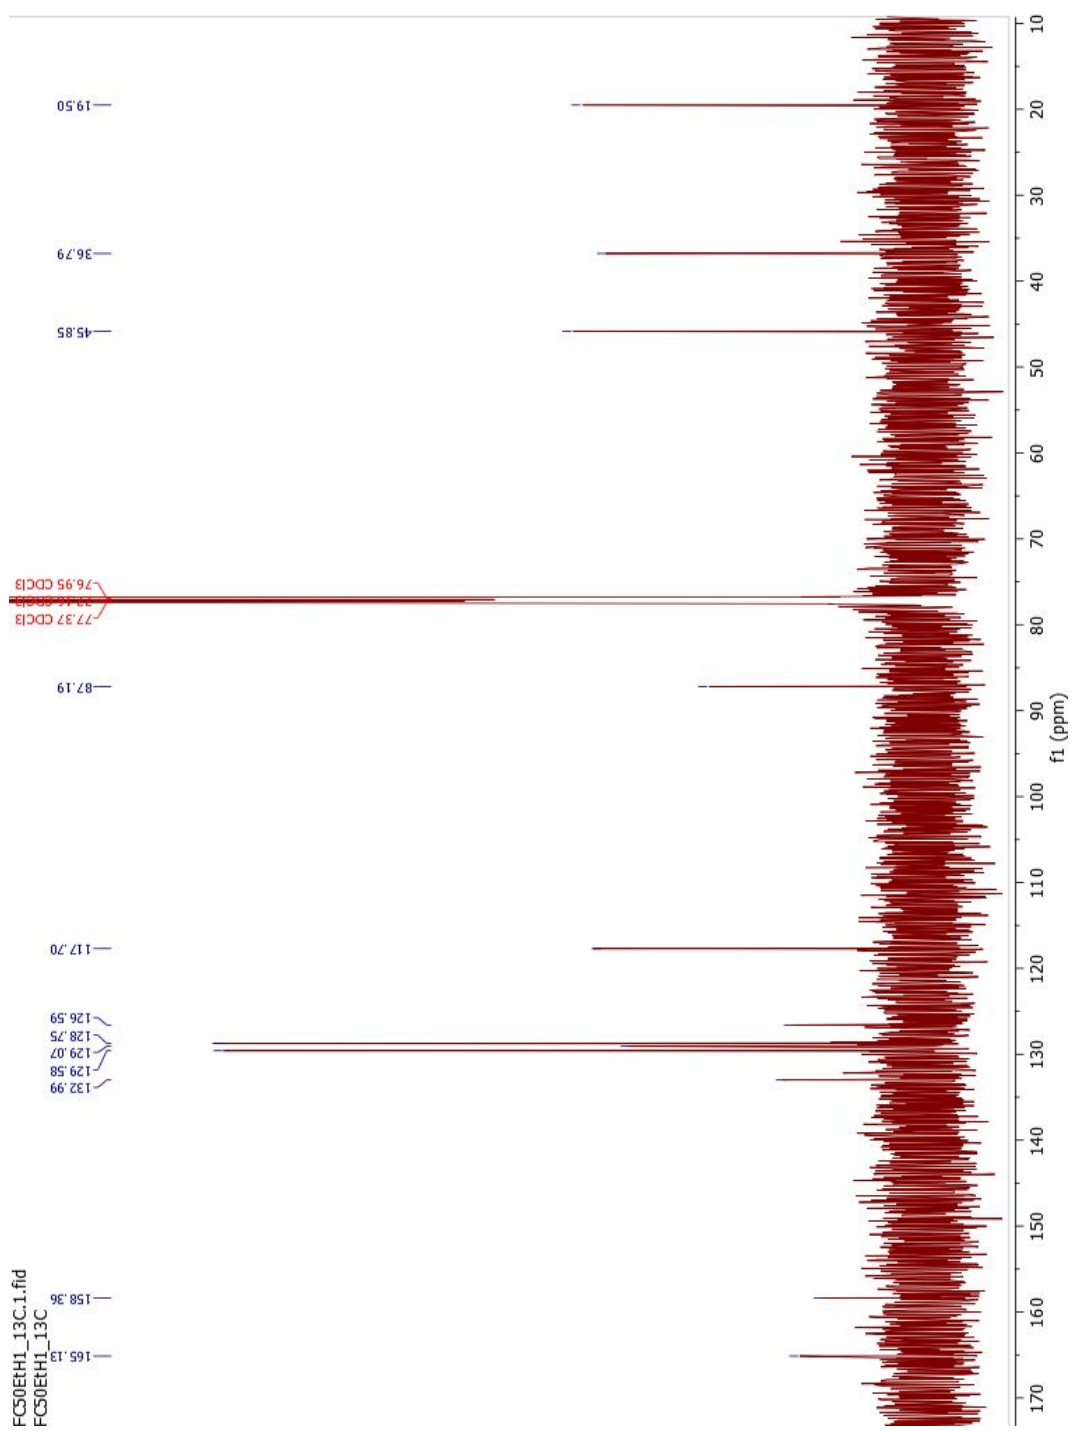

**Figure S27.**  $^{13}\text{C}$  NMR Spectrum of **6** (150 MHz,  $\text{CDCl}_3$ )

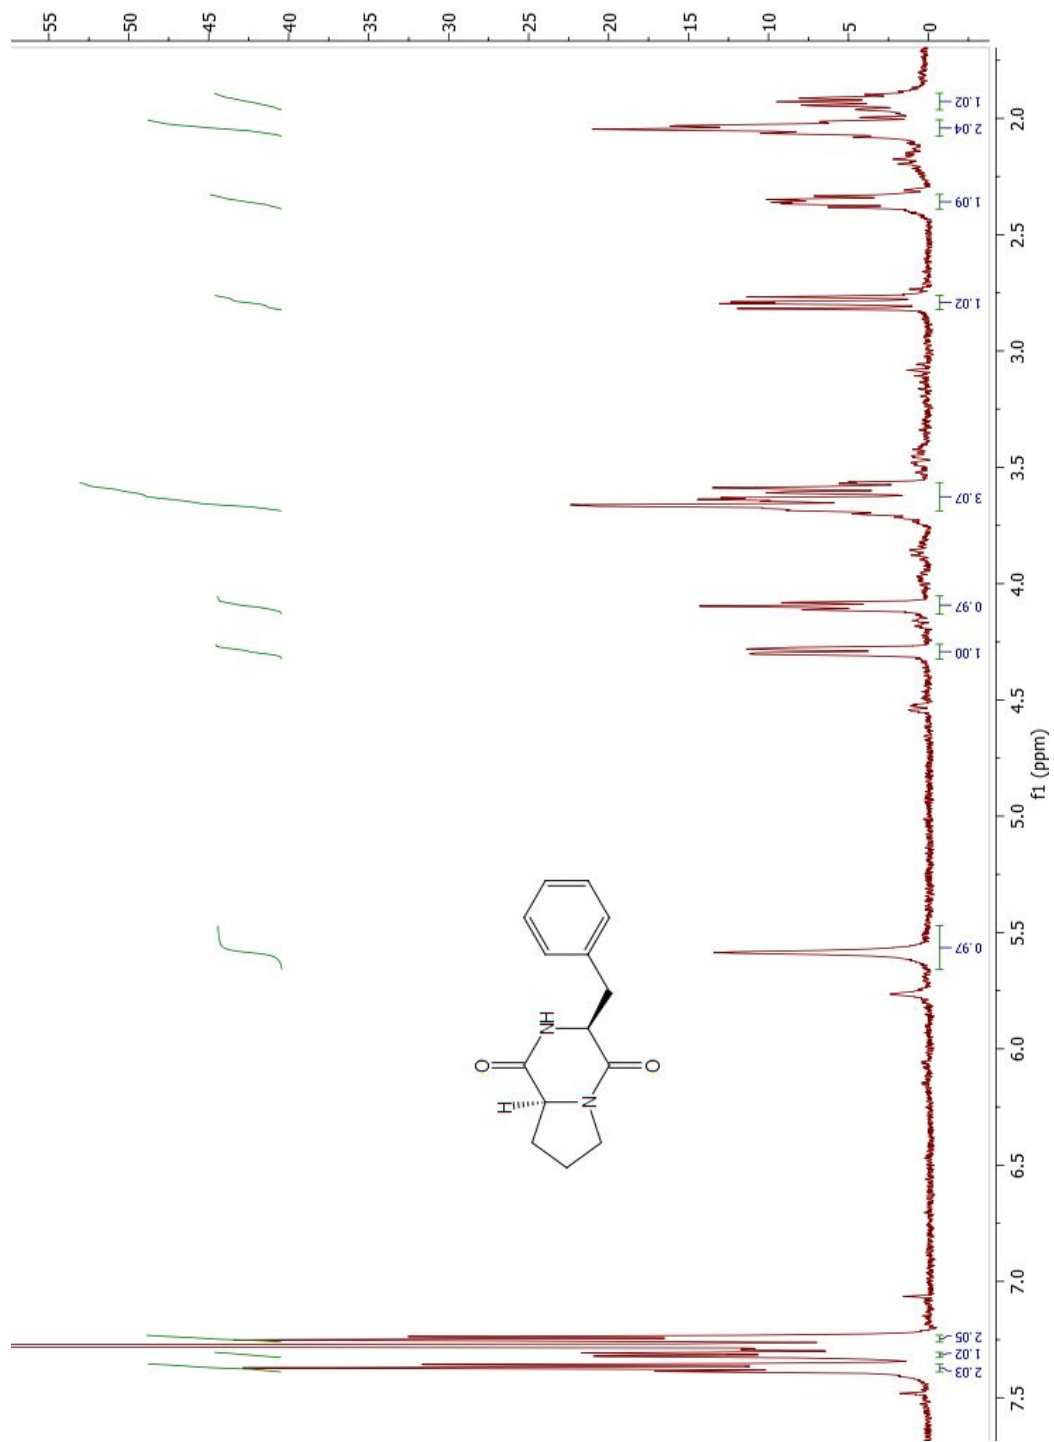

**Figure S28.**  $^1\text{H}$  NMR Spectrum of **7** (500 MHz,  $\text{CDCl}_3$ )

**Table S1.** NMR spectroscopic data of broomeanamide B (**2**) in CDCl<sub>3</sub>

| Amino acid                      | position                        | <sup>13</sup> C <sup>a</sup> | <sup>1</sup> H (mult., <i>J</i> in Hz) <sup>b</sup> | HMBC               |
|---------------------------------|---------------------------------|------------------------------|-----------------------------------------------------|--------------------|
| Pro                             | CO                              | 173.5                        | -                                                   | -                  |
|                                 | α-CH                            | 55.8                         | 4.04 (br t, 7.3)                                    | -                  |
|                                 | β <sub>1</sub> -CH <sub>2</sub> | 28.8                         | 1.07 (m)                                            | -                  |
|                                 | β <sub>2</sub> -CH <sub>2</sub> | 28.8                         | 0.55 (m)                                            | -                  |
|                                 | γ <sub>1</sub> -CH <sub>2</sub> | 25.5                         | 2.00 (m)                                            | -                  |
|                                 | γ <sub>2</sub> -CH <sub>2</sub> | 25.5                         | 1.52 (m)                                            | -                  |
|                                 | δ-CH <sub>2</sub>               | 48.2                         | 3.54 (t, 6.7)                                       | 28.8               |
| <i>N</i> -MePhe                 | CO                              | -                            | -                                                   | -                  |
|                                 | N-CH <sub>3</sub>               | 28.8                         | 2.83 (s)                                            | 173.5, 62.5        |
|                                 | α-CH                            | 62.5                         | 5.11 (dd, 10.3, 4.1)                                | -                  |
|                                 | β-CH <sub>2</sub>               | 34.0                         | 3.02 (m)                                            | 129.6, 62.5        |
|                                 | γ-C (ar.)                       | 138.3                        | -                                                   | -                  |
|                                 | δ-CH <sub>2</sub> (ar.)         | 129.6                        | 7.14 (d, 7.1)                                       | 129.6, 126.9, 34.0 |
|                                 | ε-CH <sub>2</sub> (ar.)         | 128.9                        | 7.29 (t, 7.3)                                       | 138.3, 129.6       |
|                                 | ζ-CH (ar.)                      | 126.9                        | 7.22 (t, 7.6)                                       | 129.6              |
| Ala                             | CO                              | 174.9                        | -                                                   | -                  |
|                                 | NH                              | -                            | 8.85 (d, 7.5)                                       | -                  |
|                                 | α-CH                            | 45.7                         | 4.96 (m)                                            | -                  |
|                                 | β-CH <sub>3</sub>               | 17.1                         | 1.24 (d, 6.5)                                       | 174.9, 45.7        |
| <i>N</i> -MeVal                 | CO                              | 171.6                        | -                                                   | -                  |
|                                 | N-CH <sub>3</sub>               | 31.0                         | 3.40 (s)                                            | 174.9, 56.8        |
|                                 | α-CH                            | 56.8                         | 5.31 (d, 10.6)                                      | -                  |
|                                 | β-CH                            | 38.7                         | 2.40 (m)                                            | -                  |
|                                 | γ <sub>1</sub> -CH <sub>3</sub> | 19.8                         | 1.00 (d, 6.5)                                       | 56.8, 38.7, 20.0   |
|                                 | γ <sub>2</sub> -CH <sub>3</sub> | 20.0                         | 0.95 (d, 6.5)                                       | 56.8, 38.7, 19.8   |
| <i>N</i> -MeLeu <sup>2</sup>    | CO                              | -                            | -                                                   | -                  |
|                                 | N-CH <sub>3</sub>               | 29.2                         | 2.87 (s)                                            | 171.6, 59.1        |
|                                 | α-CH                            | 59.1                         | 4.93 (m)                                            | -                  |
|                                 | β <sub>1</sub> -CH <sub>2</sub> | 38.7                         | 2.40 (m)                                            | -                  |
|                                 | β <sub>2</sub> -CH <sub>2</sub> | 38.7                         | 1.08 (m)                                            | -                  |
|                                 | γ-CH                            | 25.5                         | 1.45 (m)                                            | -                  |
|                                 | δ <sub>1</sub> -CH <sub>3</sub> | 23.6                         | 0.90 (d, 6.5)                                       | 38.7, 25.5, 22.7   |
|                                 | δ <sub>2</sub> -CH <sub>3</sub> | 22.7                         | 0.94 (d, 6.5)                                       | 38.7, 25.5         |
| Val <sup>1</sup>                | CO                              | 172.8                        | -                                                   | -                  |
|                                 | NH                              | -                            | 8.08 (d, 8.2)                                       | -                  |
|                                 | α-CH                            | 54.6                         | 4.90 (m)                                            | -                  |
|                                 | β-CH                            | 33.6                         | 1.78 (m)                                            | -                  |
|                                 | γ <sub>1</sub> -CH <sub>3</sub> | 17.9                         | 0.76 (d, 6.5)                                       | 54.6, 31.7, 20.5   |
|                                 | γ <sub>2</sub> -CH <sub>3</sub> | 22.7                         | 0.93(d, 6.5)                                        | 54.6, 31.7, 17.9   |
|                                 | <i>N</i> -MeLeu <sup>1</sup>    | CO                           | -                                                   | -                  |
| N-CH <sub>3</sub>               |                                 | 30.9                         | 2.92 (s)                                            | 172.8, 55.2        |
| α-CH                            |                                 | 55.2                         | 5.07 (brt, 7.5)                                     | -                  |
| β <sub>1</sub> -CH <sub>2</sub> |                                 | 34.9                         | 1.75 (m)                                            | -                  |
| β <sub>2</sub> -CH <sub>2</sub> |                                 | 34.9                         | 1.61                                                | -                  |
| γ-CH                            |                                 | 25.5                         | 1.45 (m)                                            | -                  |
| δ <sub>1</sub> -CH <sub>3</sub> |                                 | 22.1                         | 0.86 (d, 6.5)                                       | 34.9, 25.5, 20.1   |
| δ <sub>2</sub> -CH <sub>3</sub> |                                 | 20.1                         | 0.93 (d, 6.5)                                       | 34.9, 25.5, 22.1   |
| Val <sup>2</sup>                |                                 | CO                           | 170.9                                               | -                  |
|                                 | NH                              | -                            | 8.14 (d, 8.1)                                       | -                  |
|                                 | α-CH                            | 56.6                         | 4.31 (br t, 8.5)                                    | 170.9              |
|                                 | β-CH                            | 34.6                         | 1.74 (m)                                            | -                  |
|                                 | γ <sub>1</sub> -CH <sub>3</sub> | 18.9                         | 0.82 (d, 6.5)                                       | 56.6, 34.6, 18.7   |
|                                 | γ <sub>2</sub> -CH <sub>3</sub> | 18.7                         | 0.85 (d, 6.5)                                       | 56.6, 34.6, 18.9   |

<sup>a</sup>150 MHz; <sup>b</sup>600 MHz.



**Table S2.** NMR spectroscopic data of broomeanamide C (**3**) in CDCl<sub>3</sub>

| Amino acid                      | position                        | <sup>13</sup> C <sup>a</sup> | <sup>1</sup> H (mult., <i>J</i> in Hz) <sup>b</sup> | HMBC             |
|---------------------------------|---------------------------------|------------------------------|-----------------------------------------------------|------------------|
| Pro                             | CO                              | 173.3                        | -                                                   | -                |
|                                 | α-CH                            | 55.2                         | 4.06 (t, 6.7)                                       | -                |
|                                 | β <sub>1</sub> -CH <sub>2</sub> | 29.0                         | 1.00 (m)                                            | -                |
|                                 | β <sub>2</sub> -CH <sub>2</sub> | 29.0                         | 0.57 (m)                                            | -                |
|                                 | γ <sub>1</sub> -CH <sub>2</sub> | 25.3                         | 1.97 (m)                                            | -                |
|                                 | γ <sub>2</sub> -CH <sub>2</sub> | 25.3                         | 1.54 (m)                                            | -                |
|                                 | δ-CH <sub>2</sub>               | 48.1                         | 3.53 (m)                                            | -                |
| <i>N</i> -MePhe                 | CO                              | -                            | -                                                   | -                |
|                                 | N-CH <sub>3</sub>               | 29.0                         | 2.82 (s)                                            | 173.3, 62.4      |
|                                 | α-CH                            | 62.4                         | 5.04(dd, 11.8, 3.0)                                 | -                |
|                                 | β-CH <sub>2</sub>               | 34.2                         | 3.07 (m)                                            | -                |
|                                 | γ-C (ar.)                       | 138.2                        | -                                                   | -                |
|                                 | δ-CH <sub>2</sub> (ar.)         | 129.5                        | 7.13 (d, 7.3)                                       | 126.8            |
|                                 | ε-CH <sub>2</sub> (ar.)         | 128.7                        | 7.29 (t, 7.6)                                       | 129.5, 138.2     |
|                                 | ζ-CH (ar.)                      | 126.8                        | 7.21 (t, 6.7)                                       | 129.5            |
| Ala                             | CO                              | -                            | -                                                   | -                |
|                                 | NH                              | -                            | 8.80 (d, 8.3)                                       | -                |
|                                 | α-CH                            | 48.5                         | 4.50 (m)                                            | -                |
|                                 | β-CH <sub>3</sub>               | 17.7                         | 1.27 (d, 6.3)                                       | 172.9, 48.5      |
| Val <sup>2</sup>                | CO                              | 172.0                        | -                                                   | -                |
|                                 | N-H                             | -                            | 6.65 (d, 8.3)                                       | -                |
|                                 | α-CH                            | 54.7                         | 4.66 (m)                                            | -                |
|                                 | β-CH                            | 33.8                         | 2.10 (m)                                            | -                |
|                                 | γ <sub>1</sub> -CH <sub>3</sub> | 19.3                         | 1.10 (d, 6.4)                                       | 54.7, 20.2       |
|                                 | γ <sub>2</sub> -CH <sub>3</sub> | 20.2                         | 0.97 (d, 6.4)                                       | 54.7, 19.3       |
| <i>N</i> -MeLeu <sup>2</sup>    | CO                              | -                            | -                                                   | -                |
|                                 | N-CH <sub>3</sub>               | 29.4                         | 2.85 (s)                                            | 172.0, 59.1      |
|                                 | α-CH                            | 59.1                         | 4.84 (dd, 11.0, 2.3)                                | -                |
|                                 | β <sub>1</sub> -CH <sub>2</sub> | 38.3                         | 2.41 (m)                                            | -                |
|                                 | β <sub>2</sub> -CH <sub>2</sub> | 38.3                         | 1.30 (m)                                            | -                |
|                                 | γ-CH                            | 25.3                         | 1.54 (m)                                            | -                |
|                                 | δ <sub>1</sub> -CH <sub>3</sub> | 23.3                         | 0.89 (d, 6.4)                                       | 22.3             |
|                                 | δ <sub>2</sub> -CH <sub>3</sub> | 22.3                         | 0.94 (d, 6.4)                                       | 23.3             |
| Ile                             | CO                              | 172.4                        | -                                                   | -                |
|                                 | NH                              | -                            | 8.45 (d, 8.3)                                       | -                |
|                                 | α-CH                            | 54.9                         | 4.97 (m)                                            | -                |
|                                 | β-CH                            | 37.6                         | 1.79 (m)                                            | -                |
|                                 | γ-CH <sub>3</sub>               | 22.8                         | 0.92 (d, 6.3)                                       | -                |
|                                 | γ-CH <sub>2</sub>               | 28.4                         | 1.32 (m)                                            | -                |
|                                 | δ-CH <sub>3</sub>               | 11.3                         | 0.72 (t, 7.3)                                       | 37.6             |
|                                 | <i>N</i> -MeLeu <sup>1</sup>    | CO                           | -                                                   | -                |
| N-CH <sub>3</sub>               |                                 | 30.4                         | 2.92 (s)                                            | 172.4, 54.4      |
| α-CH                            |                                 | 54.4                         | 5.10 (t, 7.8)                                       | -                |
| β <sub>1</sub> -CH <sub>2</sub> |                                 | 34.7                         | 1.74 (m)                                            | -                |
| β <sub>2</sub> -CH <sub>2</sub> |                                 | 34.7                         | 1.62 (m)                                            | -                |
| γ-CH                            |                                 | 25.3                         | 1.45 (m)                                            | -                |
| δ <sub>1</sub> -CH <sub>3</sub> |                                 | 22.3                         | 0.86 (d, 6.4)                                       | 22.9             |
| δ <sub>2</sub> -CH <sub>3</sub> |                                 | 22.8                         | 0.92 (d, 6.4)                                       | 25.3             |
| Val <sup>1</sup>                | CO                              | -                            | -                                                   | -                |
|                                 | NH                              | -                            | 7.97 (d, 8.3)                                       | -                |
|                                 | α-CH                            | 56.5                         | 4.30 (t, 8.8)                                       | -                |
|                                 | β-CH                            | 34.7                         | 1.74 (m)                                            | -                |
|                                 | γ <sub>1</sub> -CH <sub>3</sub> | 22.5                         | 0.82 (d, 6.3)                                       | 56.5, 34.7, 18.6 |
|                                 | γ <sub>2</sub> -CH <sub>3</sub> | 18.6                         | 0.85 (d, 6.3)                                       | 34.7, 22.5       |

<sup>a</sup>150 MHz; <sup>b</sup>600 MHz.
